# A workflow for simultaneous detection of coding and non-coding transcripts by ribosomal RNA-depleted RNA-Seq.

**Short title:** Novel ribosomal RNA-depleted RNA-Seq protocol

Nikita Potemkin<sup>1,2</sup>, Sophie M.F. Cawood<sup>1,2</sup>, Jackson Treece<sup>1</sup>, Diane Guévremont<sup>1,2</sup>, Christy J. Rand<sup>1</sup>, Catriona McLean<sup>3,4</sup>, Jo-Ann L. Stanton<sup>1</sup>, Joanna M. Williams<sup>1,2,\*</sup>.

<sup>1</sup> Department of Anatomy, School of Biomedical Sciences, University of Otago, Dunedin, New Zealand

<sup>2</sup> Brain Health Research Centre, Brain Research New Zealand – Rangahau Roro Aotearoa, University of Otago, Dunedin, New Zealand

<sup>3</sup> Victorian Brain Bank, The Florey Institute of Neuroscience and Mental Health, Melbourne, Victoria, Australia

<sup>4</sup> Anatomical Pathology, The Alfred Hospital, Melbourne, Victoria, Australia

\* Correspondence to: Assoc. Prof. Joanna Williams, Department of Anatomy, School of Biomedical Sciences, University of Otago, P.O. Box 56, Dunedin, New Zealand. E-mail:

[joanna.williams@otago.ac.nz](mailto:joanna.williams@otago.ac.nz)

## 23 **Abstract**

24 RNA sequencing offers unprecedented access to the transcriptome. Key to this is the  
25 identification and quantification of many different species of RNA from the same sample at  
26 the same time. In this study we describe a novel protocol for simultaneous detection of  
27 coding and non-coding transcripts using modifications to the Ion Total RNA-Seq kit v2  
28 protocol, with integration of QIASeq FastSelect rRNA removal kit. We report highly  
29 consistent sequencing libraries can be produced from both frozen high integrity mouse  
30 hippocampal tissue and the more challenging post-mortem human tissue. Removal of rRNA  
31 using FastSelect was highly efficient, resulting in less than 1.5% rRNA content in the final  
32 library, significantly better than other reported rRNA removal techniques. We identified  
33 >30,000 unique transcripts from all samples, including protein-coding genes and many  
34 unique species of non-coding RNA, in biologically-relevant proportions. Furthermore,  
35 normalized sequencing read count for select genes significantly negatively correlated with Ct  
36 values from RT-qPCR analysis from the same samples. These results indicate that this  
37 protocol accurately and consistently identifies and quantifies a wide variety of transcripts  
38 simultaneously. The highly efficient rRNA depletion, coupled with minimized sample  
39 handling and without complicated and high-loss size selection protocols, makes this protocol  
40 useful to researchers wishing to investigate whole transcriptomes.

41

## 42 **Introduction**

43 Over the last 50 years, it has gradually been accepted that previously-dubbed “junk DNA”  
44 plays vital biochemical roles in higher organisms. This DNA does not directly code for  
45 proteins, yet makes up ~80% of the human genome. The gathering consensus is that by  
46 taking an holistic approach to the genome, not just examining protein-coding genes, it is  
47 possible gain a better understanding of the whole (1). This concept extends to the  
48 investigation of the transcriptome by RNA sequencing (RNA-Seq), which is already moving  
49 away from simply examining differential gene expression (DGE) of messenger RNA  
50 (mRNA), and towards including other species of cellular RNA. Many of these other classes  
51 of RNA are increasingly being shown to have numerous and varied biological roles, as well  
52 as being implicated in disease aetiology and pathogenesis.

53

54 Non-coding RNA (ncRNA) are attractive targets of research due to their stability (2–5),  
55 functional relevance to health and disease (6,7), and high level of evolutionary conservation  
56 (8), however, capturing these other RNA species can be more challenging than capturing  
57 mRNA. Many commercially available ncRNA sequencing kits exist, including but not  
58 limited to Illumina TruSeq Small RNA Sample kit, PerkinElmer NEXTFLEX Small RNA  
59 Library Prep Kit, and NEBNext Small RNA-Seq Kit. All of these methods rely on  
60 specifically isolating small RNA transcripts (usually <160bp) by size selection and excision  
61 of the region of interest from a solid matrix, followed by precipitating the RNA (9). While  
62 this can allow deep sequencing of RNA within that size range, it is limited in two respects.  
63 First, a significant amount of information on the transcriptome is lost through RNA falling  
64 outside of the excised size range. Second, the precipitation of RNA from the gel will never be  
65 entirely efficient, resulting in unavoidable loss of material. It would be ideal, therefore, to

66 develop a protocol that allows the researcher to identify non-coding RNA transcripts, as well  
67 as larger coding- and non-coding RNA, without material loss due to size selection.

68

69 The removal of ribosomal RNA (rRNA) from RNA samples is a crucial step in RNA-Seq  
70 methods. Ribosomal RNA is a considerable roadblock to the detection of other functionally  
71 relevant RNA species, as it makes up to 80-90% of total RNA in a cell (by mass) (10–12).  
72 Current RNA-Seq protocols generally follow one of two rRNA removal methods –  
73 enrichment of polyadenylated (poly-A) RNA or depletion of ribosomal RNA (rRNA). Poly-A  
74 selection relies on the use of oligo dT primers to capture polyadenylated transcripts. This  
75 population is largely made up of mRNA, but does not capture all mRNA. Indeed, there is  
76 considerable evidence that a significant proportion of brain-derived mRNA is non-  
77 polyadenylated, further complicating the use of poly-A selection for investigating brain  
78 transcriptomes (13–17). As a result, RNA-Seq data generated by positive capture of  
79 polyadenylated RNA do not represent information from non-polyadenylated transcripts,  
80 degraded RNA transcripts, and the vast majority of non-coding RNA species. By contrast,  
81 depleting total RNA samples of rRNA allows quantification of a more varied population of  
82 RNA species. rRNA depletion can be achieved by a variety of means, including dedicated  
83 rRNA removal kits. For example, Ribo-Zero Plus (Illumina), captures rRNA by hybridization  
84 to complimentary oligonucleotides (ONTs) coupled to magnetic beads that, when  
85 precipitated, remove the rRNA from the rest of the RNA. Another method relies on  
86 hybridizing rRNA to complementary DNA oligonucleotides. This is followed by RNaseH  
87 digestion of the RNA:DNA hybrids (NEBNext rRNA Depletion kit, Takara Bio RiboGone).  
88 Takara/Clontech SMARTer Stranded Total RNA-Seq kit also includes a proprietary method  
89 for rRNA removal that uses ZapR to degrade cDNA originating from rRNA. These methods  
90 show different rRNA depletion efficiency, depending on input RNA quality (18–21) and

91 furthermore, some variability in rRNA depletion efficiency has been reported between the  
92 implementation of the same protocol at different physical locations (18).

93

94 Generally, the literature reports rRNA making up anywhere from 0.5 - 20% of final rRNA-  
95 depleted sequencing libraries (18–22). With sequencing protocols usually generating in the  
96 vicinity of 20-30 million reads per sample, this can equate to 4-6 million reads mapping to  
97 rRNA. Better rRNA removal efficiency would result in those reads becoming available for  
98 mRNA and non-coding RNA sequence reads, of greater experimental interest to researchers.

99 Furthermore, many of these techniques include multi-step protocols, often requiring

100 precipitation steps (in the case of bead-based systems) and/or digestion or degradation steps.

101 This often results in the loss of RNA material through purification, precipitation, or digestion.

102 Thus the ideal rRNA removal technology would minimise workflow steps, sample handling,  
103 and reduce loss of material from precipitation or purification steps.

104

105 In a new development, Qiagen has released the QIAseq FastSelect rRNA removal kit, which

106 utilizes complementary ONTs that bind to rRNA and prevent their reverse transcription to

107 cDNA. The two main draws of this technology are its seamless integration into existing

108 library preparation protocols (a single pipetting step and 14 minute protocol), and the fact that

109 it does not require any additional purification, precipitation, or enrichment steps, thereby

110 minimizing sample loss. This considerable reduction in sample handling is key to accurate

111 and efficient detection of especially low-abundance transcripts.

112

113 Another perceived hurdle in effective RNA-Seq is quality of the input RNA. While

114 standardized methods exist for assessing RNA quality and the level of RNA degradation

115 (most commonly RNA Integrity Number; RIN), there is no well-defined consensus on what

116 constitutes a sample that is too degraded for RNA-Seq. Any cut-off for sample exclusion  
117 used in the literature is, therefore, almost entirely arbitrary (23,24). This is not to say,  
118 however, that difficulties do not exist when performing RNA-Seq using samples of lower  
119 quality (25–27). Firstly, as noted above, degraded RNA proscribes the use of Poly-A  
120 selection for rRNA removal, as the process of degradation renders poly-A selection  
121 inefficient, and introduces a strong 3' gene end bias to sequenced reads (28,29). Second,  
122 studies report that RNA samples of low quality (such as those obtained from post-mortem  
123 human tissue, in particular after a long post-mortem interval >24 hours) consistently show  
124 decreased proportions of mappable reads and a perceived reduction in sample complexity,  
125 with fewer highly-expressed genes and an abundance of low-expression genes (26).  
126 Here we describe an end-to-end RNA-Seq workflow and analysis pipeline that addresses  
127 some of the shortcomings of currently available protocols, in particular in rRNA depletion,  
128 minimisation of sample loss, and handling of varying input RNA quality. We demonstrate  
129 that this protocol is capable of identifying and quantifying both coding and non-coding RNA  
130 simultaneously from both high-quality and degraded RNA samples.

## 131 **Materials and Methods:**

### 132 **Animal Studies:**

133 All animal use was compliant with the New Zealand Animal Welfare Act 1991, and  
134 performed under guidelines and approval of the University of Otago Animal Ethics  
135 Committee (approval number DET09/15). In this study we utilised a double transgenic model  
136 of Alzheimer's disease (APP<sup>swe</sup>/PS1<sup>dE9</sup>, B6C3 background, hereafter referred to as  
137 APP/PS1) originally sourced from The Jackson Laboratory  
138 (<https://www.jax.org/strain/004462>) and maintained as a colony at the University of Otago  
139 breeding facility. All mice were genotyped for the presence of human exon-9-deleted variant  
140 PSEN1, which co-segregates with the APP<sup>swe</sup> gene, as previously described (30). Male  
141 transgenic (tg) and wild-type (wt) littermates at 15 months old ( $n = 4$  per group) were  
142 anaesthetised with sodium pentobarbitol and the brains removed into ice cold artificial  
143 cerebrospinal fluid solution (aCSF; in mM: 124 NaCl, 3.2 KCl, 1.25 NaH<sub>2</sub>PO<sub>4</sub>, 26 NaHCO<sub>3</sub>,  
144 2.5 CaCl<sub>2</sub>, 1.3 MgCl<sub>2</sub>, 10 d-glucose). The left hippocampus was dissected and snap-frozen on  
145 dry ice. All samples were stored at -80°C until used. RNA extracted from mouse hippocampi  
146 is henceforth referred to by the identifier "Sample #".

147

### 148 **Human Studies:**

149 Use of human tissue was compliant with the New Zealand Health and Disability Ethics  
150 Committee (14/STH/20/AM07) and the Human Research Ethics Committee of The  
151 University of Melbourne (1545740) and the Victorian Institute of Forensic Medicine (EC 18-  
152 2019). Post-mortem middle temporal gyrus (MTG) samples were received from the Victorian

153 Brain Bank (VBB). Age-matched healthy control brains (n = 4; 2 male, 2 female; age  $80.5 \pm$   
154  $8.8$ ) were defined as free from Alzheimer's Disease (AD) lesions with numbers of plaques  
155 and tangles below the cut-off values for a neuropathological diagnosis of AD (NIA Reagan  
156 criteria). No other neurological diseases were present. Alzheimer's disease brains (n = 3; 3  
157 female; age  $76.5 \pm 7.7$ ) met the standard criteria for Alzheimer's disease neuropathological  
158 diagnosis. There were no significant differences between the ages of the two groups (T-test,  
159  $p=0.55$ ). Patient gender was self-reported. All samples were stored at  $-80^{\circ}\text{C}$  until used. RNA  
160 extracted from human MTG samples is henceforth referred to by the identifier "Patient #".  
161 Patient demographics and case information are available in Supplementary Table 1.

162

### 163 **RNA extraction:**

164 Total RNA was extracted from previously-frozen tissue using the mirVana™ PARIS™ RNA  
165 isolation kit (Invitrogen; Cat #AM1556), according to the manufacturer's instructions. The  
166 concentration and purity were determined by both spectrophotometry (A260, A260/280  
167 respectively; NanoDrop 1000 Spectrophotometer; NanoDrop Technologies, Waltham, MA)  
168 and capillary electrophoresis (RNA Integrity Number [RIN], RNA 6000 Nano chip, Cat  
169 #5067-1511; Agilent Bioanalyzer 2100, Agilent Technologies).

170

### 171 **Library preparation:**

172 Except where explicitly stated, all samples, regardless of species or group of origin, were  
173 treated identically. Sequencing libraries were prepared for Ion Proton using the Ion Total  
174 RNA-Seq kit v2 (Life Technologies; Cat #4479789) largely following manufacturer's  
175 instructions. Total RNA (500ng) was used as input to the Ion Total RNA-Seq kit v2 (356ng



176 input was used instead of 500ng for Patient 1 due to low RNA yield), to which was added  
177 1µL of 1:100 ERCC Spike-In Mix 1 (Invitrogen; Cat #4456740), commonly employed to  
178 control for cross-sample variation in library preparation. RNA fragmentation by RNase III  
179 was performed at 37°C. The fragmentation time was optimised to 8 min for the mouse RNA,  
180 and 1 minute for the human RNA. This will vary depending on quality and integrity of the  
181 input RNA material. The resulting fragmented RNA was purified using the Magnetic Bead  
182 Cleanup Module (Life Technologies; Cat #4475486), and purified RNA eluted in 13µL  
183 nuclease-free water.

184

185 Ligation of Ion adapters (Ion RNA-Seq Primer Set v2; Cat #4479789) was performed using  
186 3µL of the eluted purified fragmented RNA, added to 2µL Ion Adapter Mix v2 and 3µL  
187 Hybridization solution, and incubated in a thermal cycler at 65°C for 10 min followed by  
188 30°C for 5 min. To this hybridization reaction was added 10µL 2X Ligation Buffer and 2µL  
189 Ligation Enzyme Mix, and incubated at 16°C for 16 hours in a thermal cycler. Following  
190 ligation, reverse transcription (RT) and rRNA removal was performed simultaneously as  
191 follows. RT master mix was prepared on ice (per sample; 1µL nuclease-free water, 4µL 10X  
192 RT buffer, 2µL 2.5mM dNTP Mix, 8µL ion RT Primer v2, 1µL QIAseq FastSelect rRNA  
193 removal agent). QIAseq FastSelect rRNA removal agent (Qiagen, Cat #334386) consists of  
194 ONTs complementary to ribosomal RNA sequences. These ONTs, when bound to rRNA  
195 sequences, prevent reverse transcription. The master mix was added to the ligation reaction,  
196 and incubated at 70°C for 10 minutes, followed by a step-wise cooldown (2 min at 65°C, 2  
197 min at 60°C, 2 min at 55°C, 5 min at 37°C, 5 min at 25°C, hold at 4°C). This step is  
198 necessary for the oligonucleotides in the FastSelect rRNA removal agent to bind rRNA

199 fragments and prevent reverse transcription. Finally, 4 $\mu$ L 10X Superscript Enzyme Mix was  
200 added to each reaction and the reactions incubated at 42°C for 30 min.

201

202 The resulting cDNA was purified using the Magnetic Bead Cleanup Kit, and eluted in 12 $\mu$ L  
203 nuclease-free water. In order to amplify the cDNA, 6 $\mu$ L of this elution was added to a master  
204 mix of 45 $\mu$ L Platinum PCR Supermix, 1 $\mu$ L Ion Xpress 3' Barcode Primer, and 1 $\mu$ L Ion  
205 Xpress RNA Barcode BC## (Life Technologies; Cat #4475485). This mixture was amplified  
206 in a thermal cycler for 14 cycles (Hold 2 min 94°C; Cycle 2x [94°C 30s; 50°C 30s; 68°C  
207 30s]; Cycle 14x [94°C 30s; 62°C 30s; 68°C 30s]; Hold 5 min 68°C). The amplified cDNA  
208 was purified again using the Magnetic Bead Cleanup Kit, and analysed by capillary  
209 electrophoresis (High Sensitivity DNA chip, Cat #5067-4626; Agilent Bioanalyzer 2100).

210

### 211 **Sequencing on Ion Proton Platform:**

212 The prepared sequencing libraries were diluted to equimolar concentrations of 100 pmol/L  
213 for pooling. Emulsion PCR was performed with the Ion OneTouch™ 2 system (Invitrogen)  
214 using the Ion PI™ Hi-Q™ OT2 200 kit (Invitrogen; Cat #A26434) according to the  
215 manufacturer's instructions. The four pairs of mouse samples (tg and wt) were processed  
216 simultaneously end-to-end, as were the seven human MTG samples. Libraries were  
217 sequenced on Ion PI™ v3 chips (Invitrogen; Cat #A26770), prepared using the Ion PI™  
218 HiQ™ Seq 200 kit (Invitrogen; Cat #A26433, A26772). The mouse samples of two pools of  
219 mixed barcoded libraries were sequenced on two Ion PI v3 chips (2 wt and 2 tg per chip),  
220 avoiding the use of all sequential barcodes on the same chip. Similarly, human MTG libraries

221 were sequenced in two pools of mixed barcoded libraries – one contained a pool of four  
222 samples (2 AD and 2 control), the other a pool of three samples (1 AD and 2 control).

### 223 **Reverse Transcription Quantitative Polymerase Chain Reaction (qPCR)**

224 For gene expression qPCR, using 350ng starting total RNA input from mouse samples,  
225 cDNA was generated using SuperScript IV First Strand Synthesis System (Invitrogen; Cat  
226 #18091050) per manufacturer’s instructions, utilizing priming by random hexamers. Of this  
227 cDNA, a 1:25 dilution was used for the qPCR reaction, which was performed using TaqMan  
228 Gene Expression Master Mix (Applied Biosystems, Cat #4369016), with the following  
229 TaqMan gene primers: Mouse *Hprt* (Assay ID: 03024075\_m1), *Cst7* (00438351\_m1),  
230 *Tyrobp* (00449152\_m1), *c-Fos* (00487425\_m1), *Trem2* (04209424\_m1). The reactions were  
231 amplified on a Applied Biosystems ViiA 7 system as follows: Hold 50°C 2 minutes, hold  
232 95°C 10 minutes, and 40 cycles at 95°C for 15 s and 60°C for 1 minute.

233

234 For miRNA, 10ng of total RNA from mouse samples was used. cDNA was generated using  
235 the TaqMan MicroRNA Reverse Transcription Kit (Applied Biosystems, Cat #4366596)  
236 according to manufacturer’s instructions. The qPCR reactions were prepared using TaqMan  
237 Universal PCR Master Mix (Applied Biosystems, Cat #4304437), with the following  
238 TaqMan miRNA primers: miR-34a-5p (Assay ID: 000426), miR-34c-5p (000428), miR-129-  
239 1-3p (002298), miR-210-3p (000512). The reactions were amplified on a Applied Biosystems  
240 VaaA 7 system as follows: Hold 50°C 2 minutes, hold 95°C 10 minutes, and 40 cycles at  
241 95°C for 15 s and 60°C for 1 minute.

242

243 MicroRNA and mRNA qPCR data were processed separately to account for differing input  
244 RNA amounts, and in each case, raw Ct values were used for analysis.

245

## 246 **Data Analysis:**

247 Data from each barcoded library were separated into different data files automatically on the  
248 Ion Torrent Suite version 5.4 (Life Technologies, USA). The Ion Torrent Suite was also used  
249 for analysis of ERCC Spike-In controls. Sequence read quality was evaluated using FastQC  
250 v0.11.5 (<https://www.bioinformatics.babraham.ac.uk/projects/fastqc/>) (31). Adapter  
251 sequences were trimmed from reads using AdapterRemoval v2.1.7  
252 (<https://github.com/MikkelSchubert/adapterremoval/>) (32). Reads were then trimmed for  
253 quality using Trimmomatic v0.38 (<http://www.usadellab.org/cms/?page=trimmomatic>) (33)  
254 using a 5-base sliding window, cutting when the average quality per base drops below 20,  
255 and dropping reads less than 17 bases long.

256

257 Mouse RNA reads were aligned to the *Mus musculus* GRCm38.95 reference genome  
258 (available on the Ensembl website: <http://www.ensembl.org/info/data/ftp/index.html>) and  
259 human RNA reads to the *Homo sapiens* GRCh38.96 reference genome using STAR v2.5.4b  
260 (<https://github.com/alexdobin/STAR>) (34). Reference .gtf files for RNA biotypes (protein-  
261 coding, pseudogenes, snRNA, snoRNA, unknown [TEC], Mt-RNA, lincRNA, lincRNA,  
262 antisense) were extracted from the *Mus musculus* GRCm38.95 and *Homo sapiens*  
263 GRCh38.96 annotation files using the grep command.

264

265 MicroRNA (miRNA) were quantified from aligned counts using miRDeep2 v0.1.2  
266 (<https://github.com/rajewsky-lab/mirdeep2>) (35).

267 Piwi-interacting RNA (piRNA) sequences were obtained from piRNABank  
268 (<http://pirnabank.ibab.ac.in>) (36).

269 Sequences for tRNA were obtained from the UCSC Genome Browser

270 (<http://genome.ucsc.edu>).

271

272 Data were analysed using R version 4.0.2 in RStudio v1.3.959. The following packages were

273 used: *edgeR* (37), *Rsubread* (38), *Rsamtools* (39), *stringr* (40), *ggplot2* (41), *matrixStats* (42),

274 *pheatmap* (43), *tidyverse* (44). Additional statistics (regression/correlation) were also

275 performed using R. Additional analysis and data visualisation performed using SeqMonk

276 v1.45.1 (<https://www.bioinformatics.babraham.ac.uk/projects/seqmonk/>).

277

## 278 **Data Availability:**

279 The data discussed in this publication have been deposited in NCBI's Gene Expression

280 Omnibus (45) and are accessible through GEO Series accession numbers: GSE163877

281 (<https://www.ncbi.nlm.nih.gov/geo/query/acc.cgi?acc=GSE163877>) and

282 GSE163878 (<https://www.ncbi.nlm.nih.gov/geo/query/acc.cgi?acc=GSE163878>).

283

## 284 **Results and Discussion:**

### 285 **Modified library preparation protocol consistently produces high quality** 286 **sequencing libraries.**

287 To determine whether this protocol (overview shown in Figure 1) can effectively be used to  
288 create whole transcriptome sequencing libraries from total RNA, we extracted RNA from  
289 mouse hippocampal tissue using the mirVANA Paris kit (Invitrogen) total RNA procedure.  
290 The extracted RNA was consistently highly concentrated and of high quality, as reported by  
291 the Agilent Bioanalyzer RNA Nano Chip (Table 1). The RIN was  $9.1 \pm 0.05$  (mean  $\pm$   
292 standard deviation), with an average concentration of  $174.6 \pm 27.7\text{ng}/\mu\text{L}$ . A260/280 ratios, as  
293 calculated by spectrometry, were  $> 2.12$  (Table 1;  $2.14 \pm 0.01$ ), strongly implying the lack of  
294 dsDNA contamination in the sample. Representative electropherograms of total input RNA,  
295 fragmented RNA, and amplified final libraries are shown in Figure 2. Total RNA (Fig. 2a)  
296 shows clear 18S and 28S rRNA peaks, while post-fragmentation these peaks become  
297 distributed with the overall RNA size distribution shifting downwards (Fig. 2b). The  
298 characteristic small RNA peak at  $\sim 100$  nucleotides (nt) is also clearly seen, and is retained  
299 post-fragmentation. Figure 2c shows the size distribution of the final library.

300

301 **Figure 1: An overview of the protocol described here for simultaneous detection of**  
302 **coding and non-coding RNA by RNA-Seq. Created in BioRender.com.**

303

304 **Figure 2: Representative Bioanalyzer electropherograms of (a) total input RNA, (b)**  
305 **RNA after 8 minute fragmentation by RNase III, and (c) final amplified cDNA library**  
306 **from mouse hippocampal RNA. Note the clear 18S and 28S rRNA peaks in total RNA**  
307 **(a) and their disappearance in fragmented RNA (b), as well as the downward shift of**

308 **size distribution between total RNA (a), fragmented RNA (b) and final cDNA library**  
309 **(c).**

310

311 **Table 1: RNA extraction from mouse tissue resulted in high-integrity, highly-**  
312 **concentrated total RNA.**

| Sample                             | RNA Integrity Number (RIN) | Concentration (ng/ $\mu$ L) | rRNA ratio [28s/18s] | Ratio A260/280  |
|------------------------------------|----------------------------|-----------------------------|----------------------|-----------------|
| Sample 1                           | 9                          | 198                         | 1.4                  | 2.14            |
| Sample 2                           | 9.1                        | 188                         | 1.5                  | 2.13            |
| Sample 3                           | 9.2                        | 226                         | 1.9                  | 2.14            |
| Sample 4                           | 9.4                        | 167                         | 1.9                  | 2.16            |
| Sample 5                           | 8.9                        | 144                         | 1.5                  | 2.16            |
| Sample 6                           | 9                          | 147                         | 1.5                  | 2.15            |
| Sample 7                           | 9.1                        | 165                         | 1.8                  | 2.12            |
| Sample 8                           | 9.1                        | 162                         | 1.8                  | 2.15            |
| <i>Average <math>\pm</math> SD</i> | $9.1 \pm 0.05$             | $174.6 \pm 27.7$            | $1.66 \pm 0.19$      | $2.14 \pm 0.01$ |

313

314 Next, we assessed the remainder of the library preparation protocol. We adjusted the adapter  
315 ligation period to a 16-hour (overnight) incubation at 16°C, rather than the recommended  
316 30°C for 30 minutes. This markedly increased adapter ligation efficiency 15-fold (From 53  
317 pg/ $\mu$ L to 745.5 pg/ $\mu$ L; Suppl. Figure 1). While this does, of course, increase the time required  
318 for library preparation, this significant increase in ligation efficiency outweighs this  
319 drawback.

320

321 Removal of rRNA was performed by addition of the Qiagen FastSelect rRNA removal agent  
322 to the cDNA synthesis steps. Hybridization of the FastSelect ONTs was achieved by the step-  
323 wise cooldown of the reaction mix from 65°C to 25°C, before addition of Superscript  
324 Enzyme Mix. The final cDNA libraries showed size distributions in-line with manufacturer's  
325 recommendations (up to 200-base fragments for the Ion Proton system), with <50% of cDNA  
326 fragments falling under 160 base pairs (bp) (Fig. 2c). Since the libraries include small RNA

327 species like miRNA which, including adapters, lie in the 40-45 bp size range, we expect to  
328 see a slightly higher proportion of the final library below 160 bp.

329

330 The library preparation protocol described here resulted in sequencing libraries ranging from  
331 25.5 to 159.2 nmol/L in concentration. Library and sequence run metrics are given in Table 2.  
332 The mean read length for each library ranged from 63 to 113 bp, with an average of  
333 23,695,819 total raw reads. Filtering of low quality reads using the specifications described in  
334 the methods and removal of adapter sequences resulted in between 11,991,333 (sample 1)  
335 and 22,422,158 reads (sample 3). Between 73.36% and 83.77% of raw reads remained post-  
336 processing. There was no significant correlation between either raw reads ( $R^2 = 0.40$ ) or  
337 filtered reads ( $R^2 = 0.19$ ) and input RNA RIN.

338

339 **Table 2: Library and sequencing metrics for mouse RNA samples.**

| Sample   | Final Library molarity (pmol/L) | Barcode ## | # Raw reads | Mean read length (bp) | # quality filtered reads | % Post-filtering |
|----------|---------------------------------|------------|-------------|-----------------------|--------------------------|------------------|
| Sample 1 | 25,963.90                       | 1          | 17,487,705  | 63                    | 11,991,333               | 73.36            |
| Sample 2 | 25,459.80                       | 2          | 20,424,675  | 86                    | 14,329,078               | 80.61            |
| Sample 3 | 71,161.70                       | 5          | 31,493,446  | 92                    | 22,422,158               | 77.9             |
| Sample 4 | 39,349.50                       | 6          | 27,138,089  | 93                    | 18,407,710               | 72.99            |
| Sample 5 | 109,683.40                      | 3          | 21,131,492  | 96                    | 16,486,584               | 83.77            |
| Sample 6 | 55,390.00                       | 4          | 24,032,524  | 113                   | 18,236,544               | 80.07            |
| Sample 7 | 90,893.50                       | 7          | 25,463,277  | 90                    | 19,414,166               | 80.23            |
| Sample 8 | 159,175.50                      | 8          | 22,395,347  | 103                   | 17,274,480               | 80               |

340

341 Alignment to the reference genome resulted in between 58% and 75% uniquely mapped  
342 reads, 17.5% and 35% multi-mapped reads, 1.33% and 2% mapped to too many (>10) loci,  
343 and 5-12% unmapped reads (Table 3/Figure 3). These figures are consistently on the higher  
344 end of previously reported mapping statistics (46).

345 **Table 3: Read Alignment statistics for mouse RNA samples**



| Sample   | Uniquely mapped reads | Uniquely mapped % | Multi-mapped reads | Multi-mapped % | Mapped to too many loci | Mapped to too many loci % | Unmapped % |
|----------|-----------------------|-------------------|--------------------|----------------|-------------------------|---------------------------|------------|
| Sample 1 | 8,129,518             | 67.79             | 2,098,856          | 17.5           | 221,679                 | 1.85                      | 12.86      |
| Sample 2 | 10,658,465            | 74.38             | 2,760,489          | 19.26          | 191,067                 | 1.33                      | 5.02       |
| Sample 3 | 14,989,536            | 66.85             | 5,545,647          | 24.73          | 427,075                 | 1.9                       | 6.51       |
| Sample 4 | 12,882,689            | 69.99             | 4,051,474          | 22.01          | 370,911                 | 2.01                      | 5.99       |
| Sample 5 | 9,556,157             | 57.96             | 5,757,276          | 34.92          | 234,205                 | 1.42                      | 5.7        |
| Sample 6 | 11,483,874            | 62.97             | 5,237,205          | 28.72          | 364,546                 | 2                         | 6.31       |
| Sample 7 | 13,532,973            | 69.71             | 4,321,515          | 22.26          | 259,941                 | 1.34                      | 6.69       |
| Sample 8 | 12,333,236            | 71.4              | 3,644,129          | 21.1           | 267,752                 | 1.55                      | 5.96       |

346

347 **Figure 3: RNA reads were mapped to the ENSEMBL *Mus musculus* GRCm38.95**

348 **annotated genome. Uniquely mapped reads, multi-mapped reads, reads mapped to too**

349 **many loci (>10), and unmapped reads for each sample shown as a percentage of total**

350 **trimmed and filtered reads.**

351 **High-quality sequencing libraries even from fresh-frozen human post-**  
352 **mortem brain tissue.**

353 RNA extracted from VBB brain tissue was less intact, as determined by electropherography,  
354 with an average RIN of  $2.3 \pm 0.2$ , and of lower concentrations than mouse RNA from similar  
355 amount of tissue input ( $68.57\text{ng}/\mu\text{L} \pm 15.77$ ; Table 4, Figure 4). A260/280 ratios, as  
356 calculated by NanoDrop, all lay above 2 (Table 4;  $2.09 \pm 0.04$ ), again suggesting that the  
357 samples did not contain dsDNA. Notably, however, the resulting libraries were comparable in  
358 concentration and size distribution to those resulting from high quality mouse RNA ( $122.4$   
359  $\text{nmol}/\text{L} \pm 21.5$ ; Table 5). Representative electropherograms of starting input RNA,  
360 fragmented RNA, and final libraries are shown in Figure 4. While the input RNA (Fig. 4a)  
361 lacks the defined 18S/28S rRNA peaks seen in Figure 2a, the 1 minute fragmented RNA (Fig.  
362 4b) electropherogram shows a very similar size distribution to 8 minute fragmented mouse  
363 RNA (Fig. 2b). Again, the characteristic small RNA peak at  $\sim 100$  nt is also clearly seen, and  
364 is retained post-fragmentation. Similarly, the final library size distribution (Fig. 4c) is  
365 comparable to that seen in Figure 2c. Library and sequencing statistics are shown in Table 5.  
366 The mean read length varied from 71 to 115 bp, with an average of 25,441,497 reads per  
367 sample. Quality filtering and adapter removal resulted in on average 15,855,518 reads per  
368 sample, leaving between 70% and 81% of reads post-processing. Again, there was no  
369 significant correlation between either raw reads ( $R^2 = 0.005$ ) or filtered reads ( $R^2 = 0.0004$ )  
370 and input RNA RIN.

371

| Sample | RNA Integrity | Concentration | rRNA ratio | Ratio |
|--------|---------------|---------------|------------|-------|
|--------|---------------|---------------|------------|-------|

|                                    | Number (RIN)   | (ng/ $\mu$ L)   | (28s/18s)      | A260/280        |
|------------------------------------|----------------|-----------------|----------------|-----------------|
| <b>Patient 1</b>                   | 2.5            | 39.6            | 0.2            | 2.1             |
| <b>Patient 2</b>                   | 1.9            | 84.2            | 0              | 2.11            |
| <b>Patient 3</b>                   | 2.3            | 79.6            | 2.4            | 2.12            |
| <b>Patient 4</b>                   | 2.2            | 80.9            | 0              | 2.02            |
| <b>Patient 5</b>                   | 2.3            | 66.9            | 0.2            | 2.12            |
| <b>Patient 6</b>                   | 2.5            | 57.4            | 0              | 2.05            |
| <b>Patient 7</b>                   | 2.2            | 71.4            | 0              | 2.09            |
| <b>Average <math>\pm</math> SD</b> | $2.27 \pm 0.2$ | $68.6 \pm 15.8$ | $0.4 \pm 0.89$ | $2.09 \pm 0.04$ |

372 **Table 4 RNA extraction from human post-mortem tissue resulted in low-integrity total**  
 373 **RNA.**

374

375 **Table 5: Library and sequencing statistics for human-derived RNA samples.**

| Sample           | Final Library molarity (pmol/L) | Barcode ## | # Raw reads | Mean read length | # quality filtered reads | % Post-filtering |
|------------------|---------------------------------|------------|-------------|------------------|--------------------------|------------------|
| <b>Patient 1</b> | 131,574.30                      | 6          | 28,212,506  | 105              | 18,562,867               | 70.13            |
| <b>Patient 2</b> | 131,068.10                      | 2          | 28,789,188  | 109              | 19,003,266               | 73.98            |
| <b>Patient 3</b> | 88,007.30                       | 4          | 29,588,767  | 71               | 19,774,398               | 73               |
| <b>Patient 4</b> | 134,256.40                      | 3          | 20,982,426  | 106              | 15,431,060               | 81.11            |
| <b>Patient 5</b> | 142,720.10                      | 7          | 26,888,887  | 96               | 20,344,613               | 79.63            |
| <b>Patient 6</b> | 134,278.50                      | 1          | 23,085,633  | 101              | 16,661,101               | 79.13            |
| <b>Patient 7</b> | 95,156.50                       | 5          | 20,543,075  | 115              | 15,211,322               | 79.54            |

376

377 **Figure 4: Representative Bioanalyzer electropherograms of (a) total input RNA, (b)**  
 378 **RNA after 1 minute fragmentation by RNase III, and (c) final amplified cDNA library**  
 379 **from human MTG RNA. Despite the lack of a distinct 18S/28S rRNA peak profile (a),**  
 380 **fragmentation of RNA by RNase III for 1 minute (b) resulted in a size distribution**  
 381 **consistent with both previous preparations, and those recommended in the Ion Total**  
 382 **RNA-Seq kit v2 User Guide. Final libraries (c) also show size distribution consistent**  
 383 **with manufacturers recommendation, with <30% falling between 50 and 160 bp.**

384

385 Alignment to the human reference genome uniquely mapped between 79% and 82% of reads,  
 386 and multi-mapped between 12% and 15% of reads (Table 6/Figure 5). Only ~3% of reads

387 were mapped to too many loci, and between 2-3% of reads were unmapped. The proportion  
388 of uniquely-mapped reads is consistent with previously described mapping statistics, though  
389 with a considerably lower percentage of unmapped reads (46,47). We therefore demonstrate  
390 that the described protocol produces quality libraries from even fresh-frozen human post-  
391 mortem input RNA.

392

393 **Figure 5: RNA reads were mapped to the ENSEMBL *Homo sapiens* GRCh38.96**  
394 **annotated genome. Uniquely mapped reads, multi-mapped reads, reads mapped to too**  
395 **many loci (>10), and unmapped reads for each sample shown as a percentage of total**  
396 **reads.**

397

398 **Table 6: Read Alignment statistics for human-derived RNA samples**

| Sample    | Uniquely mapped reads | Uniquely mapped % | Multi-mapped reads | Multi-mapped % | Mapped to too many loci | Mapped to too many loci % | Unmapped % |
|-----------|-----------------------|-------------------|--------------------|----------------|-------------------------|---------------------------|------------|
| Patient 1 | 14,689,409            | 79.13             | 2,869,622          | 15.46          | 554,660                 | 2.99                      | 2.42       |
| Patient 2 | 15,312,048            | 80.58             | 2,673,472          | 14.07          | 523,535                 | 2.75                      | 2.6        |
| Patient 3 | 14,815,243            | 74.92             | 3,796,504          | 19.2           | 628,450                 | 3.18                      | 2.7        |
| Patient 4 | 12,681,322            | 82.18             | 1,948,225          | 12.63          | 465,695                 | 3.02                      | 2.17       |
| Patient 5 | 16,171,475            | 79.49             | 3,154,060          | 15.5           | 627,631                 | 3.08                      | 1.92       |
| Patient 6 | 13,619,025            | 81.74             | 2,197,338          | 13.19          | 505,216                 | 3.03                      | 2.04       |
| Patient 7 | 12,427,195            | 81.7              | 2,033,866          | 13.37          | 398,154                 | 2.62                      | 2.32       |

399

400 **Qiagen FastSelect rRNA removal agent results in minimal rRNA content.**

401 To assess the effectiveness of Qiagen FastSelect rRNA removal agent, we used SeqMonk  
402 RNA-Seq QC to quantify the percentage of reads mapped to rRNA sequences in both the  
403 mouse and human samples. Ribosomal RNA content in RNA extracted from the mouse  
404 hippocampal tissue was between 0.23 – 1.24% ( $0.81 \pm 0.37$ ; n=8) , and alignment to  
405 mitochondrial RNA (Mt-rRNA and Mt-tRNA) accounted for, on average,  $0.25 \pm 0.17\%$  and  
406  $0.87 \pm 0.49\%$  respectively. Similarly, in the human RNA, the same protocol quantified rRNA  
407 content between 0.034 – 0.39% ( $0.11 \pm 0.13$ ; n=7), with mitochondrial rRNA and tRNA  
408 accounting for, on average,  $0.28 \pm 0.27$  and  $5.11 \pm 3.23\%$  respectively. As an average Ion PI  
409 Chip loaded with four samples returns ~25 million reads per sample, a total RNA library prep  
410 without rRNA depletion would result in ~22 million reads mapping to rRNA, whereas the  
411 protocol described here resulted in only ~100-200,000 reads mapped to rRNA. Compared to  
412 other techniques for rRNA removal from sequencing libraries, the technique described here  
413 performed consistently better than previously published methods, which range anywhere from  
414 1% to 20% rRNA content (18–22). Thus the considerable reduction in rRNA content  
415 achieved by our protocol frees up valuable sequencing resources.

416

417 **This library preparation protocol and analysis pipeline identifies a variety**  
418 **of coding- and non-coding-RNA in biologically-relevant proportions.**

419 To achieve an estimate of the ability of this workflow to identify transcripts of interest, we  
420 performed bioinformatic analysis to determine a) how many different transcripts can be  
421 identified from the RNA-Seq data and b) what kind of transcripts can be identified.

422 We calculated Reads Per Kilobase Million (RPKM) for mouse and human RNA samples to  
423 normalise the number of unique transcripts detected for sequencing depth and gene length.  
424 Mouse samples identified >18,500 unique transcripts expressed at greater than one RPKM  
425 and in total ~31,000 expressed at greater than 0.1 RPKM, representing ~50% of total  
426 annotated transcripts in the reference genome (Figure 6). For the human samples, a similar  
427 number of transcripts were found at >1 RPKM, with more than ~35,000 unique transcripts at  
428 >0.1 RPKM, representing ~60% of the total annotated transcripts in the reference genome  
429 (Figure 6). This is in stark contrast to some of the reported difficulties in RNA-Seq using  
430 low-quality input RNA – notably decreased proportions of mappable reads and reduction in  
431 sample complexity (26). In fact, our data suggest that this protocol results in proportions of  
432 successfully mapped reads and levels of gene expression comparable to high-quality,  
433 undegraded RNA samples.

434

435 **Figure 6: Number of genes detected at >1 Reads per Kilobase Million (RPKM; dark**  
436 **green) and >0.1 RPKM (light green) for each mouse sample and human sample. RPKM**  
437 **here was used as a proxy for normalized expression. The number of genes detected at**  
438 **RPKM >0.1 is suggestive of the ability of this workflow to detect large numbers of low-**  
439 **expressed genes, many of which are non-coding.**

440 Breakdown of read alignment by transcript biotype (as annotated in each reference genome – *Mus musculus* GRCm38.100 and *Homo sapiens*  
441 GRCh38.96 – as well as piRNA and tRNA from piRNABank and UCSC Genome Browser respectively) is shown in Table 6 and 7. The average  
442 percentage content by gene biotype is shown in Figure 7. The largest number of reads mapped to protein-coding mRNA, (Mouse - 48.86%  $\pm$   
443 6.02; human – 40.22%  $\pm$  4.43). There were numerous alignments to various species of ncRNA, including miRNA, piRNA, snRNA, snoRNA,  
444 lincRNA, and pseudogenes. As expected, a higher proportion of reads mapped to non-coding RNA in the human samples compared to the  
445 mouse, consistent with recent indications that organism complexity is reliant on non-coding RNA, rather than genome size (48). With the  
446 removal of rRNA from the prepared libraries, proportions of ncRNA correspond approximately to reported cellular RNA contents (49). Many  
447 species of non-coding RNA show very narrow variance between samples (Fig. 8), while others varied significantly. In particular, small nuclear  
448 RNA (snRNA) expression was highly variable, ranging from 4 to 23% in mouse RNA (Fig. 8a), and 2.5 to 15.5% in human RNA (Fig. 8b).  
449 Despite their frequent use as reference genes for qPCR and gene array experiments, individual variability in snRNA expression has been  
450 reported previously (50,51), and these observations are supported by the data presented here. One important caveat to consider, however, is that  
451 PCR amplification is known to favour smaller fragments over larger ones (52). As such, it is possible (even likely) that transcripts associated  
452 with small non-coding RNA are overrepresented in our final sequencing libraries. However, this effect is likely consistent across samples and  
453 libraries, and would certainly not affect the identification of unique transcripts. As is often recommended for RNA-Seq experiments, further  
454 investigation and validation of differentially-expressed transcripts by, for example, quantitative PCR would address this concern with regards to  
455 absolute quantification.

456

457 **Table 6: Percentage mouse RNA reads mapped to gene biotypes per sample, as annotated in the *Mus musculus* GRCm38.95, as well as**  
 458 **tRNA annotations from UCSC Genome Browser, piRNA annotations from piRNABank.**

| Samples | lincRNA | snoRNA | snRNA | Pseudogenes | piRNA | miRNA | miscRNA | Antisense | Unknown | Protein coding | lncRNA | tRNA | rRNA | Mt-rRNA | Mt-tRNA |
|---------|---------|--------|-------|-------------|-------|-------|---------|-----------|---------|----------------|--------|------|------|---------|---------|
| 1       | 2.65    | 15.03  | 6.74  | 3.15        | 1.94  | 3.71  | 4.38    | 1.20      | 1.33    | 51.62          | 0.03   | 3.80 | 2.52 | 0.53    | 1.38    |
| 2       | 2.13    | 7.13   | 11.09 | 3.27        | 3.02  | 2.35  | 10.07   | 1.06      | 0.48    | 54.91          | 0.04   | 1.72 | 2.14 | 0.20    | 0.40    |
| 3       | 1.31    | 2.72   | 18.03 | 4.12        | 2.63  | 4.65  | 13.77   | 0.79      | 0.39    | 47.92          | 0.03   | 0.87 | 1.70 | 0.25    | 0.81    |
| 4       | 1.51    | 2.54   | 4.11  | 4.50        | 1.72  | 7.62  | 20.06   | 0.96      | 0.52    | 52.07          | 0.04   | 0.59 | 2.83 | 0.31    | 0.61    |
| 5       | 1.32    | 3.73   | 18.61 | 2.90        | 2.92  | 4.14  | 17.15   | 0.77      | 0.42    | 44.04          | 0.03   | 0.99 | 1.03 | 0.16    | 1.79    |
| 6       | 1.15    | 2.10   | 23.01 | 2.45        | 4.05  | 5.95  | 21.93   | 0.66      | 0.36    | 36.58          | 0.03   | 0.81 | 0.23 | 0.13    | 0.57    |
| 7       | 1.71    | 3.25   | 17.23 | 3.60        | 3.63  | 3.41  | 9.95    | 1.02      | 0.60    | 50.99          | 0.04   | 0.66 | 2.58 | 0.38    | 0.98    |
| 8       | 1.55    | 3.10   | 16.55 | 3.53        | 3.57  | 3.34  | 10.76   | 0.94      | 0.45    | 53.68          | 0.04   | 0.72 | 1.15 | 0.17    | 0.46    |

459

460 **Table 7: Percentage human RNA reads mapped to gene biotypes per sample, as annotated in the *Homo sapiens* GRCh38.96, as well as**  
 461 **tRNA annotations from UCSC Genome Browser, piRNA annotations from piRNABank.**

| Samples   | lincRNA | snoRNA | snRNA | Pseudogenes | piRNA | miRNA | Antisense | Unknown | Protein coding | lncRNA | tRNA  | rRNA | Mt-rRNA | Mt-tRNA |
|-----------|---------|--------|-------|-------------|-------|-------|-----------|---------|----------------|--------|-------|------|---------|---------|
| Patient 1 | 4.04    | 29.44  | 6.70  | 2.96        | 1.45  | 0.91  | 3.19      | 0.22    | 37.19          | 0.03   | 8.08  | 0.26 | 0.19    | 5.36    |
| Patient 2 | 4.23    | 19.54  | 6.53  | 4.26        | 2.49  | 0.75  | 3.74      | 0.27    | 46.67          | 0.03   | 9.33  | 0.46 | 0.23    | 1.46    |
| Patient 3 | 4.18    | 23.93  | 2.54  | 2.35        | 1.43  | 2.57  | 2.79      | 0.36    | 33.23          | 0.03   | 12.96 | 1.34 | 0.89    | 11.39   |
| Patient 4 | 5.15    | 22.74  | 10.61 | 2.73        | 1.58  | 1.06  | 2.36      | 0.39    | 42.79          | 0.03   | 4.10  | 0.32 | 0.20    | 5.96    |
| Patient 5 | 4.05    | 26.91  | 7.98  | 2.08        | 1.49  | 1.21  | 3.07      | 0.14    | 38.50          | 0.02   | 8.55  | 0.34 | 0.19    | 5.45    |
| Patient 6 | 4.43    | 22.71  | 15.49 | 2.49        | 1.35  | 0.73  | 2.78      | 0.28    | 40.04          | 0.03   | 5.72  | 0.24 | 0.13    | 3.60    |
| Patient 7 | 5.59    | 23.90  | 11.28 | 2.88        | 1.60  | 0.58  | 2.75      | 0.25    | 43.15          | 0.03   | 5.08  | 0.25 | 0.13    | 2.52    |



463 **Figure 7: Percentage RNA reads mapped to gene biotypes for (a) mouse and (b) human**  
464 **samples, averaged across samples. The largest proportion for both samples is made up**  
465 **of protein coding RNA. However in both mouse and human RNA, protein-coding RNA**  
466 **made up less than 50% of the total, with the majority being various forms of non-coding**  
467 **RNA.**

468

469 **Figure 8: Box and whisker plot showing the range of percentages of reads mapped to**  
470 **gene biotypes for (a) mouse and (b) human samples. The majority of RNA species in**  
471 **both samples show very small ranges, while some (notably snRNA and snoRNA) are**  
472 **more variable between samples.**

473

474

475 **Select gene sequencing reads significantly correlate with cycle threshold**

476 **(Ct) values obtained by quantitative PCR.**

477 In order to ascertain to what extent sequencing reads obtained from this protocol can be  
478 representative of the actual number of RNA molecules in the sample, we performed RT-  
479 qPCR analysis of selected genes and miRNA from the mouse samples. We then determined  
480 the correlation coefficient (Pearson's Product-Moment Correlation) of Ct values against  
481 RPKM, in order to control for library size and gene length (Figure 9). We found that both  
482 mRNA (*Hprt*, *Trem2*, *Tyrobp*, *c-Fos*, and *Cst7*;  $R^2 = -0.81$ ,  $p = 3.2e-10$ ; Fig. 9a) and miRNA  
483 (miR-129-1-3p, miR-34a-5p, miR-34c-5p, miR-210-3p;  $R^2 = -0.59$ ,  $p = 0.00036$ ; Fig. 9b)  
484 showed significant negative correlation between Ct values and normalized sequencing reads.  
485 This strongly suggests that data obtained from this sequencing method results in read counts  
486 that are largely representative of actual RNA content, and lends credence to differential gene  
487 expression analyses performed with these data.

488

489 **Figure 9: Correlation between Ct values from qPCR and normalized sequencing reads**  
490 **mapped to select genes (a) and miRNA (b). Gene sequencing reads were normalized for**  
491 **library size and gene length using RPKM, while miRNA reads were normalized for**  
492 **library size using CPM. Both sets of data passed Shapiro-Wilk tests of normality**  
493 **( $p > 0.05$ ). The linear regression line, confidence interval, Pearson's correlation**  
494 **coefficient, and significance value are indicated.**

495

## 496 **Conclusions:**

497 RNA sequencing is an ever-evolving technique that offers unique insights into the  
498 transcriptome. Current protocols often require the researcher to choose between investigating  
499 mRNA (by poly-A selection) or small RNA (by size selection). Either one of these alone,  
500 while offering great depth of sequencing, misses out on a great deal of information from  
501 excluded transcripts. There is room, therefore, for a protocol to investigate the whole  
502 transcriptome, from the same sample at the same time.

503

504 Here we report a novel method for whole transcriptome ribosomal-depleted RNA-Seq. This  
505 approach takes advantage of several existing commercially available kits, with some  
506 important alterations to manufacturer's protocols. This altered workflow resulted in high  
507 quality sequencing libraries from input RNA samples of a variety of quality, from both  
508 mouse and human tissue. Low quality input RNA had no negative effect on the final library  
509 quality. Qiagen FastSelect rRNA removal agent integrated seamlessly into the existing Ion  
510 Total RNA-Seq kit v2 library prep protocol, and resulted in highly effective depletion of  
511 rRNA from the final libraries, even from degraded samples, which is often a drawback of  
512 other rRNA removal techniques. A high number of genes were identified in the RNA-Seq  
513 data, including transcripts often overlooked by more targeted RNA-Seq protocols (refer Fig.  
514 7). The majority of reads mapped to species of non-coding RNA, and most of these were also  
515 highly consistent between samples within each species. Furthermore, sequencing reads  
516 (normalized to library size and gene length) correlate significantly with Ct values from qPCR  
517 quantitation (which allows for the most precise quantification of RNA content), suggesting  
518 that read counts obtained from this RNA-Seq protocol can be used to infer quantitative gene  
519 expression.

520 A similar protocol (fragmented, ribodepleted TGIRT-Seq) has been previously reported (53–  
521 55), that also aimed to simultaneously sequence coding and non-coding RNA. While it has  
522 seen some limited implementation since (56,57), it is yet to be widely accepted. There are a  
523 few factors where we believe improvements can be made. First, the use of QIASeq FastSelect  
524 for rRNA depletion we found superior to the RiboZero Gold used by Boivin and colleagues  
525 (reagent now defunct). While we did not compare these two methods directly, the comparison  
526 can be inferred through the literature. Crucially, rRNA-removal by FastSelect requires  
527 significantly less sample handling than RiboZero Gold, and does not require additional bead  
528 purification, preventing sample loss. Second, the protocol described here appears to give  
529 more representative non-coding RNA reads – in particular with regards to miRNA and  
530 piRNA – as compared to estimated abundances reported in literature (49,53). Altogether, we  
531 believe this workflow may be useful to researchers wishing to investigate the whole  
532 transcriptome simultaneously, with effective rRNA depletion, and without complicated and  
533 high-loss size selection protocols commonly used for small RNA-Seq, or poly-A selection for  
534 mRNA-Seq.

## 535 **Acknowledgements**

536 Human post-mortem tissues were received from the Victorian Brain Bank Network,  
537 supported by The Florey, The Alfred and the Victorian Institute of Forensic Medicine and  
538 funded in part by Parkinson’s Victoria, MND Victoria, Fight MND and Yulgilbar  
539 Foundation. We acknowledge Dr. Bruce Mockett for management of the transgenic mouse  
540 colony.

- 541 1. Pennisi E. ENCODE Project Writes Eulogy for Junk DNA. *Science* (80- ).  
542 2012;337(6099):1159–61.
- 543 2. Ayupe AC, Tahira AC, Camargo L, Beckedorff FC, Verjovski-Almeida S, Reis EM.  
544 Global analysis of biogenesis, stability and sub-cellular localization of lncRNAs  
545 mapping to intragenic regions of the human genome. *RNA Biol.* 2015;12(8):877–92.
- 546 3. Clark MB, Johnston RL, Inostroza-Ponta M, Fox AH, Fortini E, Moscato P, et al.  
547 Genome-wide analysis of long noncoding RNA stability. *Genome Res.* 2012;22:885–  
548 98.
- 549 4. Tani H, Mizutani R, Salam KA, Tano K, Ijiri K, Wakamatsu A, et al. Genome-wide  
550 determination of RNA stability reveals hundreds of short-lived noncoding transcripts  
551 in mammals. *Genome Res.* 2012;22:947–56.
- 552 5. Friedel CC, Dölken L, Ruzsics Z, Koszinowski UH, Zimmer R. Conserved principles  
553 of mammalian transcriptional regulation revealed by RNA half-life. *Nucleic Acids*  
554 *Res.* 2009;37(17):115.
- 555 6. Laura Idda M, Munk R, Abdelmohsen K, Gorospe M. Noncoding RNAs in  
556 Alzheimer’s Disease HHS Public Access. *Wiley Interdiscip Rev RNA.* 2018;9(2).
- 557 7. Schwarzenbach H, Nishida N, Calin GA, Pantel K. Clinical relevance of circulating  
558 cell-free microRNAs in cancer. *Nat Rev | Clin Oncol.* 2014;11:145–56.
- 559 8. Qu Z, Adelson DL. Evolutionary conservation and functional roles of ncRNA. *Front*  
560 *Genet.* 2012 Oct;3(OCT):205.
- 561 9. Yeri A, Courtright A, Danielson K, Hutchins E, Alsop E, Carlson E, et al. Evaluation  
562 of commercially available small RNASeq library preparation kits using low input  
563 RNA. *BMC Genomics.* 2018 May;19(1).
- 564 10. Duncan R, Hershey JW. Identification and quantitation of levels of protein synthesis  
565 initiation factors in crude HeLa cell lysates by two-dimensional polyacrylamide gel

- 566 electrophoresis. *J Biol Chem*. 1983 Jun;258(11):7228–35.
- 567 11. Wolf SF, Schlessinger D. Nuclear metabolism of ribosomal RNA in growing,  
568 methionine-limited, and ethionine-treated HeLa cells. *Biochemistry*. 1977  
569 Jun;16(12):2783–91.
- 570 12. Blobel G, Potter VR. Studies on free and membrane-bound ribosomes in rat liver. I.  
571 Distribution as related to total cellular RNA. *J Mol Biol*. 1967 Jun;26(2):279–92.
- 572 13. Harris DA, Sherbany AA. Cloning of non-polyadenylated RNAs from rat brain. *Mol*  
573 *Brain Res*. 1991;10(1):83–90.
- 574 14. Van Ness J, Maxwell IH, Hahn WE. Complex population of nonpolyadenylated  
575 messenger RNA in mouse brain. *Cell*. 1979 Dec;18(4):1341–9.
- 576 15. Snider BJ, Morrison-Bogorad M. Brain non-adenylated mRNAs. *Brain Res Rev*.  
577 1992;17(3):263–82.
- 578 16. McKernan KJ, Peckham HE, Costa GL, McLaughlin SF, Fu Y, Tsung EF, et al.  
579 Sequence and structural variation in a human genome uncovered by short-read,  
580 massively parallel ligation sequencing using two-base encoding. *Genome Res*. 2009  
581 Sep;19(9):1527–41.
- 582 17. Yang L, Duff MO, Graveley BR, Carmichael GG, Chen L-L. Genomewide  
583 characterization of non-polyadenylated RNAs. *Genome Biol*. 2011;12(2):R16.
- 584 18. Herbert ZT, Kershner JP, Butty VL, Thimmapuram J, Choudhari S, Alekseyev YO, et  
585 al. Cross-site comparison of ribosomal depletion kits for Illumina RNAseq library  
586 construction. *BMC Genomics*. 2018;19:1–10.
- 587 19. Huang R, Jaritz M, Guenzl P, Vlatkovic I, Sommer A, Tamir IM, et al. An RNA-Seq  
588 Strategy to Detect the Complete Coding and Non-Coding Transcriptome Including  
589 Full-Length Imprinted Macro ncRNAs. *PLoS One*. 2011 Nov;6(11):e27288.
- 590 20. Culviner PH, Guegler CK, Laub MT. A Simple, Cost-Effective, and Robust Method

- 591 for rRNA Depletion in RNA-Sequencing Studies. Cooper VS, editor. MBio. 2020  
592 Apr;11(2):e00010-20.
- 593 21. Cui P, Lin Q, Ding F, Xin C, Gong W, Zhang L, et al. A comparison between ribo-  
594 minus RNA-sequencing and polyA-selected RNA-sequencing. *Genomics*.  
595 2010;96(5):259–65.
- 596 22. Haile S, Corbett RD, Bilobram S, Mungall K, Grande BM, Kirk H, et al. Evaluation of  
597 protocols for rRNA depletion-based RNA sequencing of nanogram inputs of  
598 mammalian total RNA. *PLoS One*. 2019 Oct;14(10):e0224578.
- 599 23. Imbeaud S, Graudens E, Boulanger V, Barlet X, Zaborski P, Eveno E, et al. Towards  
600 standardization of RNA quality assessment using user-independent classifiers of  
601 microcapillary electrophoresis traces. *Nucleic Acids Res*. 2005 Mar;33(6):e56.
- 602 24. Weis S, Llenos IC, Dulay JR, Elashoff M, Martínez-Murillo F, Miller CL. Quality  
603 control for microarray analysis of human brain samples: The impact of postmortem  
604 factors, RNA characteristics, and histopathology. *J Neurosci Methods*. 2007  
605 Sep;165(2):198–209.
- 606 25. Schuierer S, Carbone W, Knehr J, Petitjean V, Fernandez A, Sultan M, et al. A  
607 comprehensive assessment of RNA-seq protocols for degraded and low-quantity  
608 samples. *BMC Genomics*. 2017;18(1):442.
- 609 26. Gallego Romero I, Pai AA, Tung J, Gilad Y. RNA-seq: impact of RNA degradation on  
610 transcript quantification. *BMC Biol*. 2014;12(1):42.
- 611 27. Li S, Tighe SW, Nicolet CM, Grove D, Levy S, Farmerie W, et al. Multi-platform  
612 assessment of transcriptome profiling using RNA-seq in the ABRF next-generation  
613 sequencing study. *Nat Biotechnol*. 2014 Sep;32(9):915–25.
- 614 28. Zhao W, He X, Hoadley KA, Parker JS, Hayes DN, Perou CM. Comparison of RNA-  
615 Seq by poly (A) capture, ribosomal RNA depletion, and DNA microarray for

- 616 expression profiling. *BMC Genomics*. 2014;15(1):419.
- 617 29. Cieslik M, Chugh R, Wu Y-M, Wu M, Brennan C, Lonigro R, et al. The use of exome  
618 capture RNA-seq for highly degraded RNA with application to clinical cancer  
619 sequencing. *Genome Res*. 2015/08/07. 2015 Sep;25(9):1372–81.
- 620 30. Ryan MM, Guévremont D, Mockett BG, Abraham WC, Williams JM. Circulating  
621 Plasma microRNAs are Altered with Amyloidosis in a Mouse Model of Alzheimer’s  
622 Disease. *J Alzheimers Dis*. 2018;66(2):835–52.
- 623 31. Andrews S. FastQC: A Quality Control Tool for High Throughput Sequence Data.  
624 2015 Jun;
- 625 32. Schubert M, Lindgreen S, Orlando L. AdapterRemoval v2: rapid adapter trimming,  
626 identification, and read merging. *BMC Res Notes*. 2016 Dec;9(1):88.
- 627 33. Bolger AM, Lohse M, Usadel B. Trimmomatic: A flexible trimmer for Illumina  
628 sequence data. *Bioinformatics*. 2014 Aug;30(15):2114–20.
- 629 34. Dobin A, Davis CA, Schlesinger F, Drenkow J, Zaleski C, Jha S, et al. STAR:  
630 Ultrafast universal RNA-seq aligner. *Bioinformatics*. 2013 Jan;29(1):15–21.
- 631 35. Friedländer MR, MacKowiak SD, Li N, Chen W, Rajewsky N. MiRDeep2 accurately  
632 identifies known and hundreds of novel microRNA genes in seven animal clades.  
633 *Nucleic Acids Res*. 2012 Jan;40(1):37–52.
- 634 36. Sai lakshmi S, Agrawal S. piRNABank: A web resource on classified and clustered  
635 Piwi-interacting RNAs. *Nucleic Acids Res*. 2008 Jan;36(SUPPL. 1):D173.
- 636 37. Robinson MD, McCarthy DJ, Smyth GK. edgeR: a Bioconductor package for  
637 differential expression analysis of digital gene expression data. *Bioinformatics*. 2010  
638 Jan;26(1):139–40.
- 639 38. Liao Y, Smyth GK, Shi W. The R package Rsubread is easier, faster, cheaper and  
640 better for alignment and quantification of RNA sequencing reads. *Nucleic Acids Res*.



- 641 2019 May;47(8):e47–e47.
- 642 39. Morgan M, Pagès H, Obenchain V, Hayden N. Rsamtools: Binary alignment (BAM),  
643 FASTA, variant call (BCF), and tabix file import. R package version 2.4.0. 2020.
- 644 40. Wickham H. stringr: Sample, Consistent Wrappers for Common String Operations.  
645 2019.
- 646 41. Wickham H. ggplot2: Elegant Graphics for Data Analysis. New York: Springer-  
647 Verlag; 2016.
- 648 42. Bengtsson H. matrixStats: Functions that Apply to Rows and Columns of Matrices  
649 (and to Vectors). 2020.
- 650 43. Kolde R. pheatmap: Pretty Heatmaps. 2019.
- 651 44. Wickham H, Averick M, Bryan J, Chang W, McGowan L, François R, et al. Welcome  
652 to the Tidyverse. J Open Source Softw. 2019 Nov;4(43):1686.
- 653 45. Edgar R, Domrachev M, Lash AE. Gene Expression Omnibus: NCBI gene expression  
654 and hybridization array data repository. Nucleic Acids Res [Internet]. 2002 Jan  
655 1;30(1):207–10. Available from: <https://pubmed.ncbi.nlm.nih.gov/11752295>
- 656 46. McDermaid A, Chen X, Zhang Y, Wang C, Gu S, Xie J, et al. A New Machine  
657 Learning-Based Framework for Mapping Uncertainty Analysis in RNA-Seq Read  
658 Alignment and Gene Expression Estimation. Vol. 9, Frontiers in Genetics. 2018. p.  
659 313.
- 660 47. Dharshini SAP, Taguchi Y-H, Gromiha MM. Identifying suitable tools for variant  
661 detection and differential gene expression using RNA-seq data. Genomics.  
662 2020;112(3):2166–72.
- 663 48. Gregory TR. The C-value enigma in plants and animals: a review of parallels and an  
664 appeal for partnership. Ann Bot. 2005 Jan;95(1):133–46.
- 665 49. Palazzo AF, Lee ES. Non-coding RNA: what is functional and what is junk? Vol. 6,

- 666 Frontiers in Genetics. 2015. p. 2.
- 667 50. O'Reilly D, Dienstbier M, Cowley SA, Vazquez P, Drozd M, Taylor S, et al.  
668 Differentially expressed, variant U1 snRNAs regulate gene expression in human cells.  
669 Genome Res. 2012/10/15. 2013 Feb;23(2):281–91.
- 670 51. Dvinge H, Guenthoer J, Porter PL, Bradley RK. RNA components of the spliceosome  
671 regulate tissue- and cancer-specific alternative splicing. Genome Res. 2019  
672 Oct;29(10):1591–604.
- 673 52. Shagin DA, Lukyanov KA, Vagner LL, Matz M V. Regulation of average length of  
674 complex PCR product. Nucleic Acids Res. 1999 Sep;27(18):e23-i-e23-iii.
- 675 53. Boivin V, Deschamps-Francoeur G, Couture S, Nottingham RM, Bouchard-Bourelle  
676 P, Lambowitz AM, et al. Simultaneous sequencing of coding and noncoding RNA  
677 reveals a human transcriptome dominated by a small number of highly expressed  
678 noncoding genes. RNA. 2018/04/27. 2018 Jul;24(7):950–65.
- 679 54. Nottingham RM, Wu DC, Qin Y, Yao J, Hunicke-Smith S, Lambowitz AM. RNA-seq  
680 of human reference RNA samples using a thermostable group II intron reverse  
681 transcriptase. RNA. 2016 Apr;22(4):597–613.
- 682 55. Qin Y, Yao J, Wu DC, Nottingham RM, Mohr S, Hunicke-Smith S, et al. High-  
683 throughput sequencing of human plasma RNA by using thermostable group II intron  
684 reverse transcriptases. RNA. 2016 Jan;22(1):111–28.
- 685 56. Xu H, Yao J, Wu DC, Lambowitz AM. Improved TGIRT-seq methods for  
686 comprehensive transcriptome profiling with decreased adapter dimer formation and  
687 bias correction. Sci Rep. 2019 May;9(1):7953.
- 688 57. Yao J, Wu DC, Nottingham RM, Lambowitz AM. Identification of protein-protected  
689 mRNA fragments and structured excised intron RNAs in human plasma by TGIRT-  
690 seq peak calling. Elife. 2020 Sep;9.



# Workflow for whole-transcriptome rRNA-depleted RNA-Seq

APP<sup>swe</sup>/PSEN1<sup>dE9</sup>  
(C57BL6) and WT  
littermates (n=8)

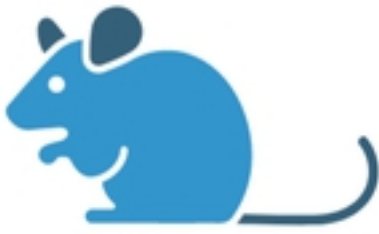

Left hippocampus

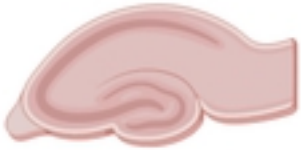

Human post-mortem brain  
tissue from Victorian Brain  
Bank (n=7)

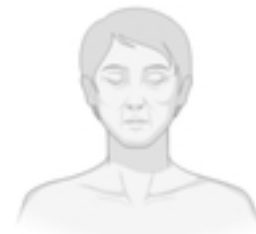

Middle temporal  
gyrus

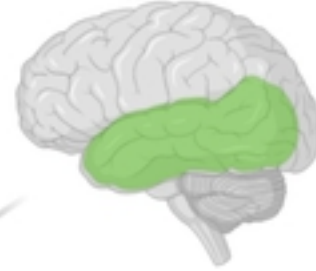

bioRxiv preprint doi: <https://doi.org/10.1101/2021.01.04.425201>; this version posted January 4, 2021. The copyright holder for this preprint (which was not certified by peer review) is the author/funder, who has granted bioRxiv a license to display the preprint in perpetuity. It is made available under aCC-BY 4.0 International license.

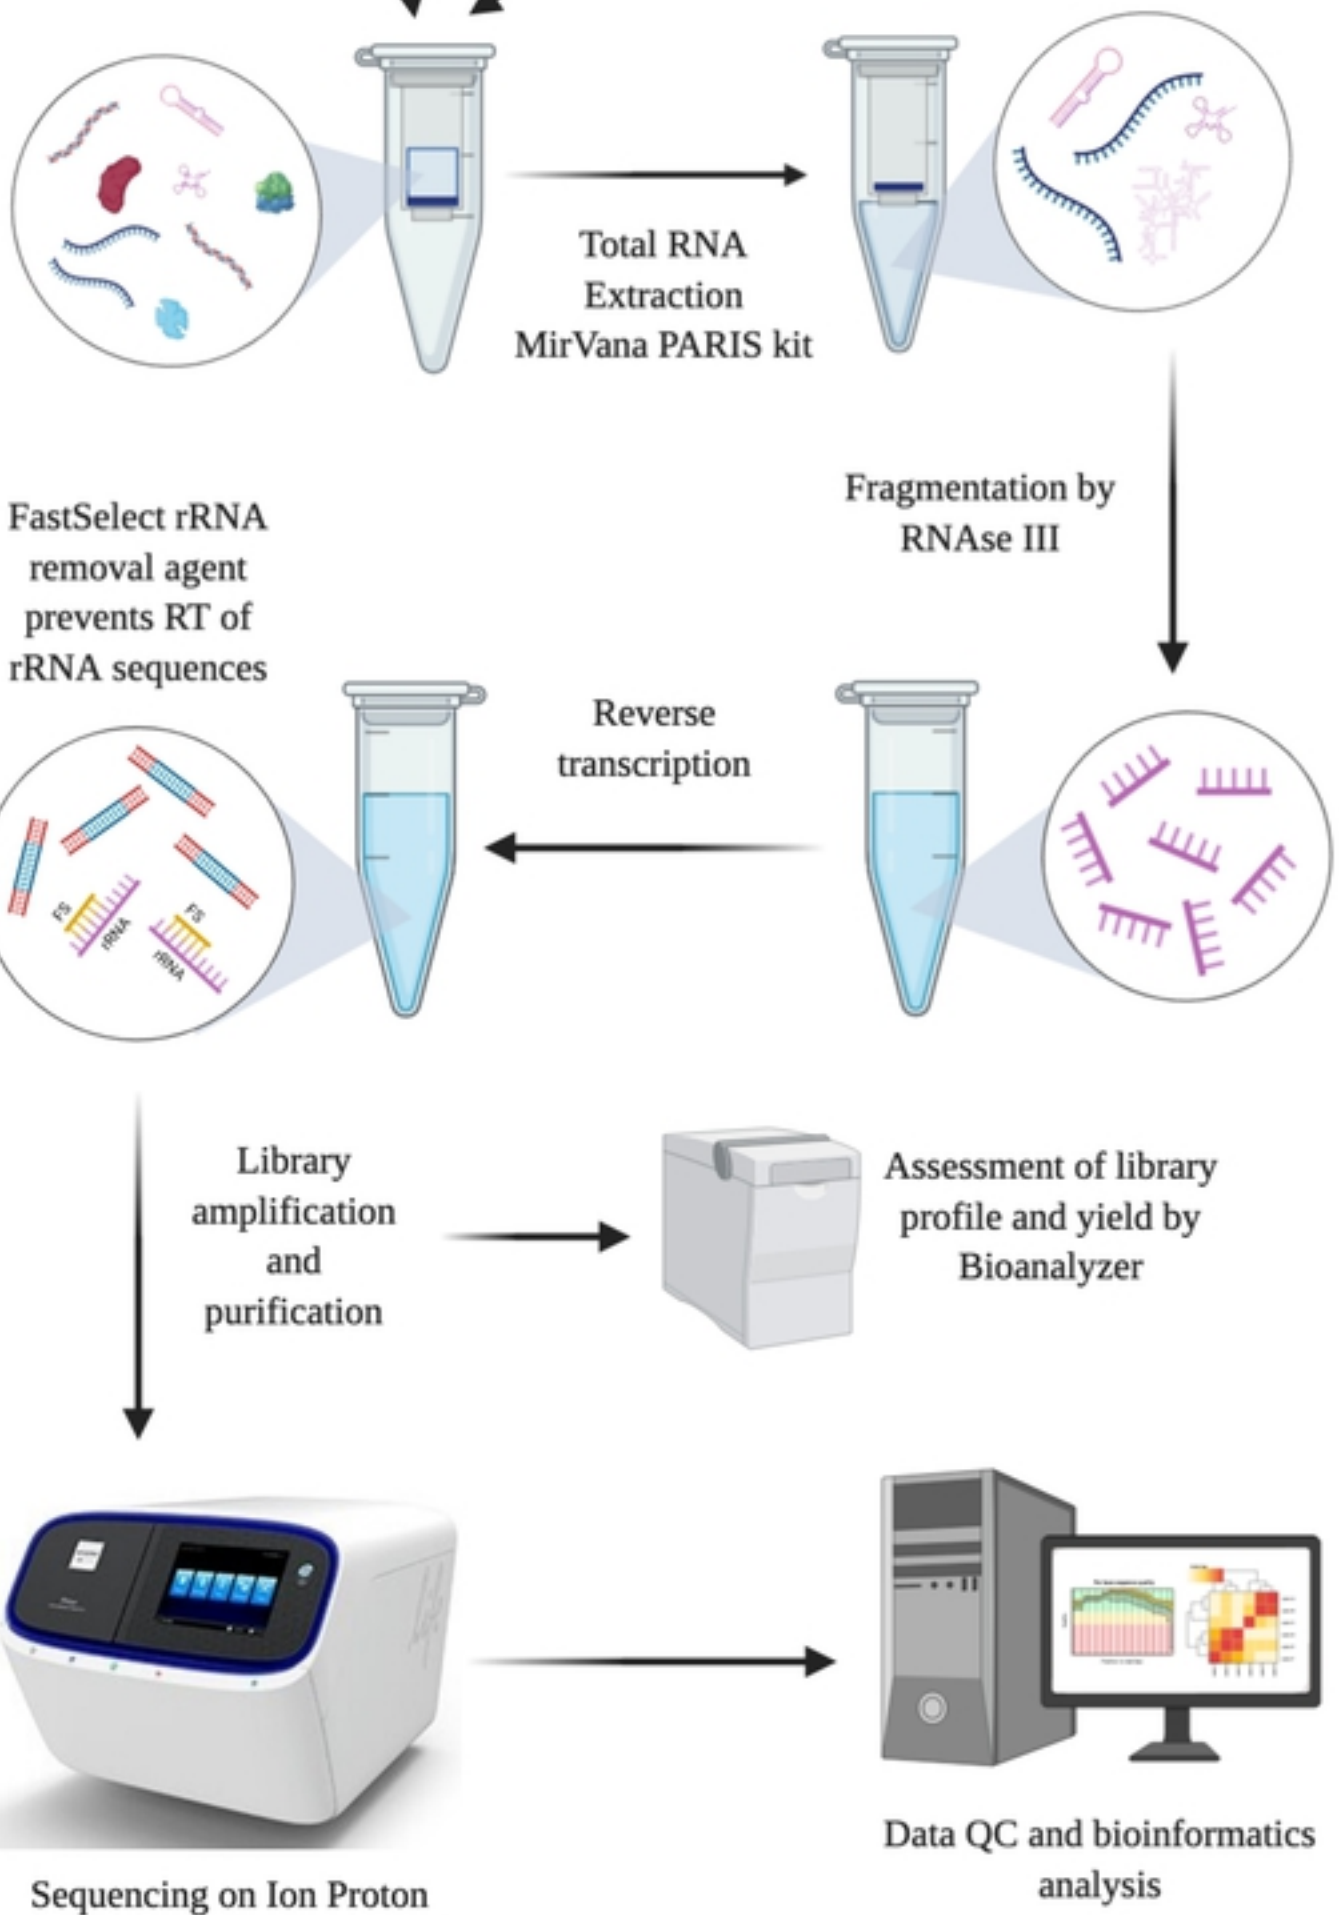

Fig.1

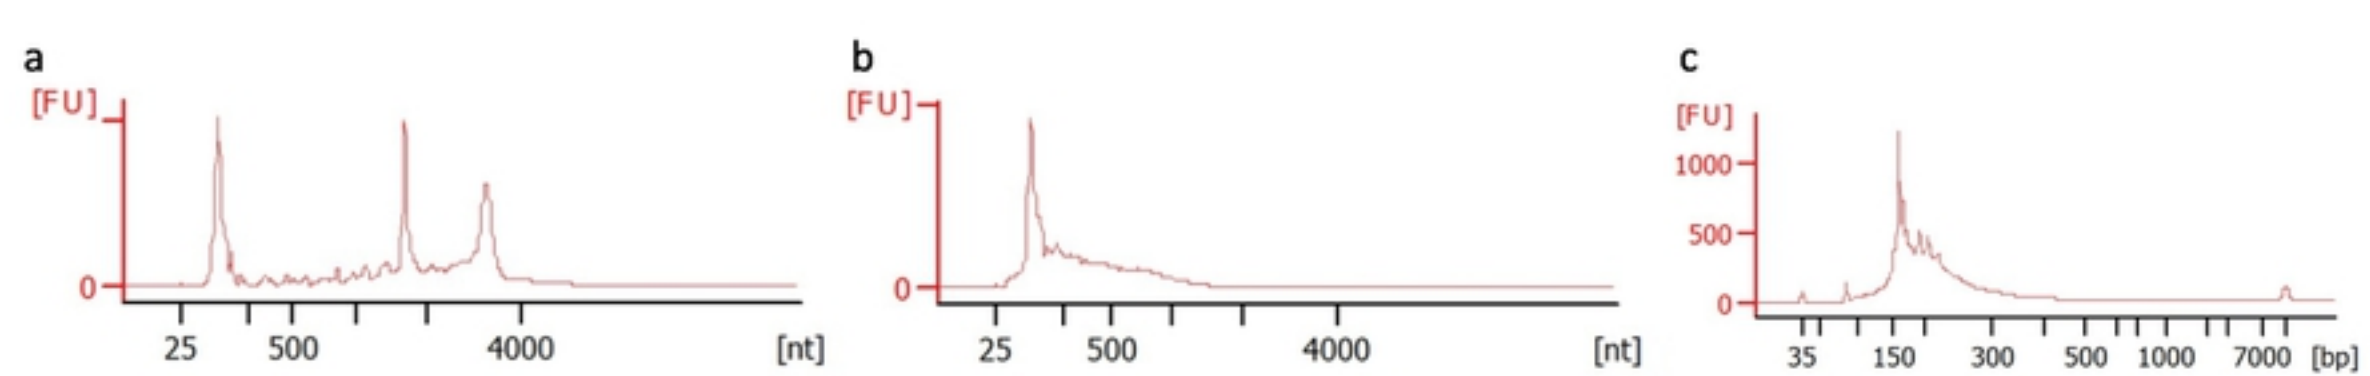

Fig.2

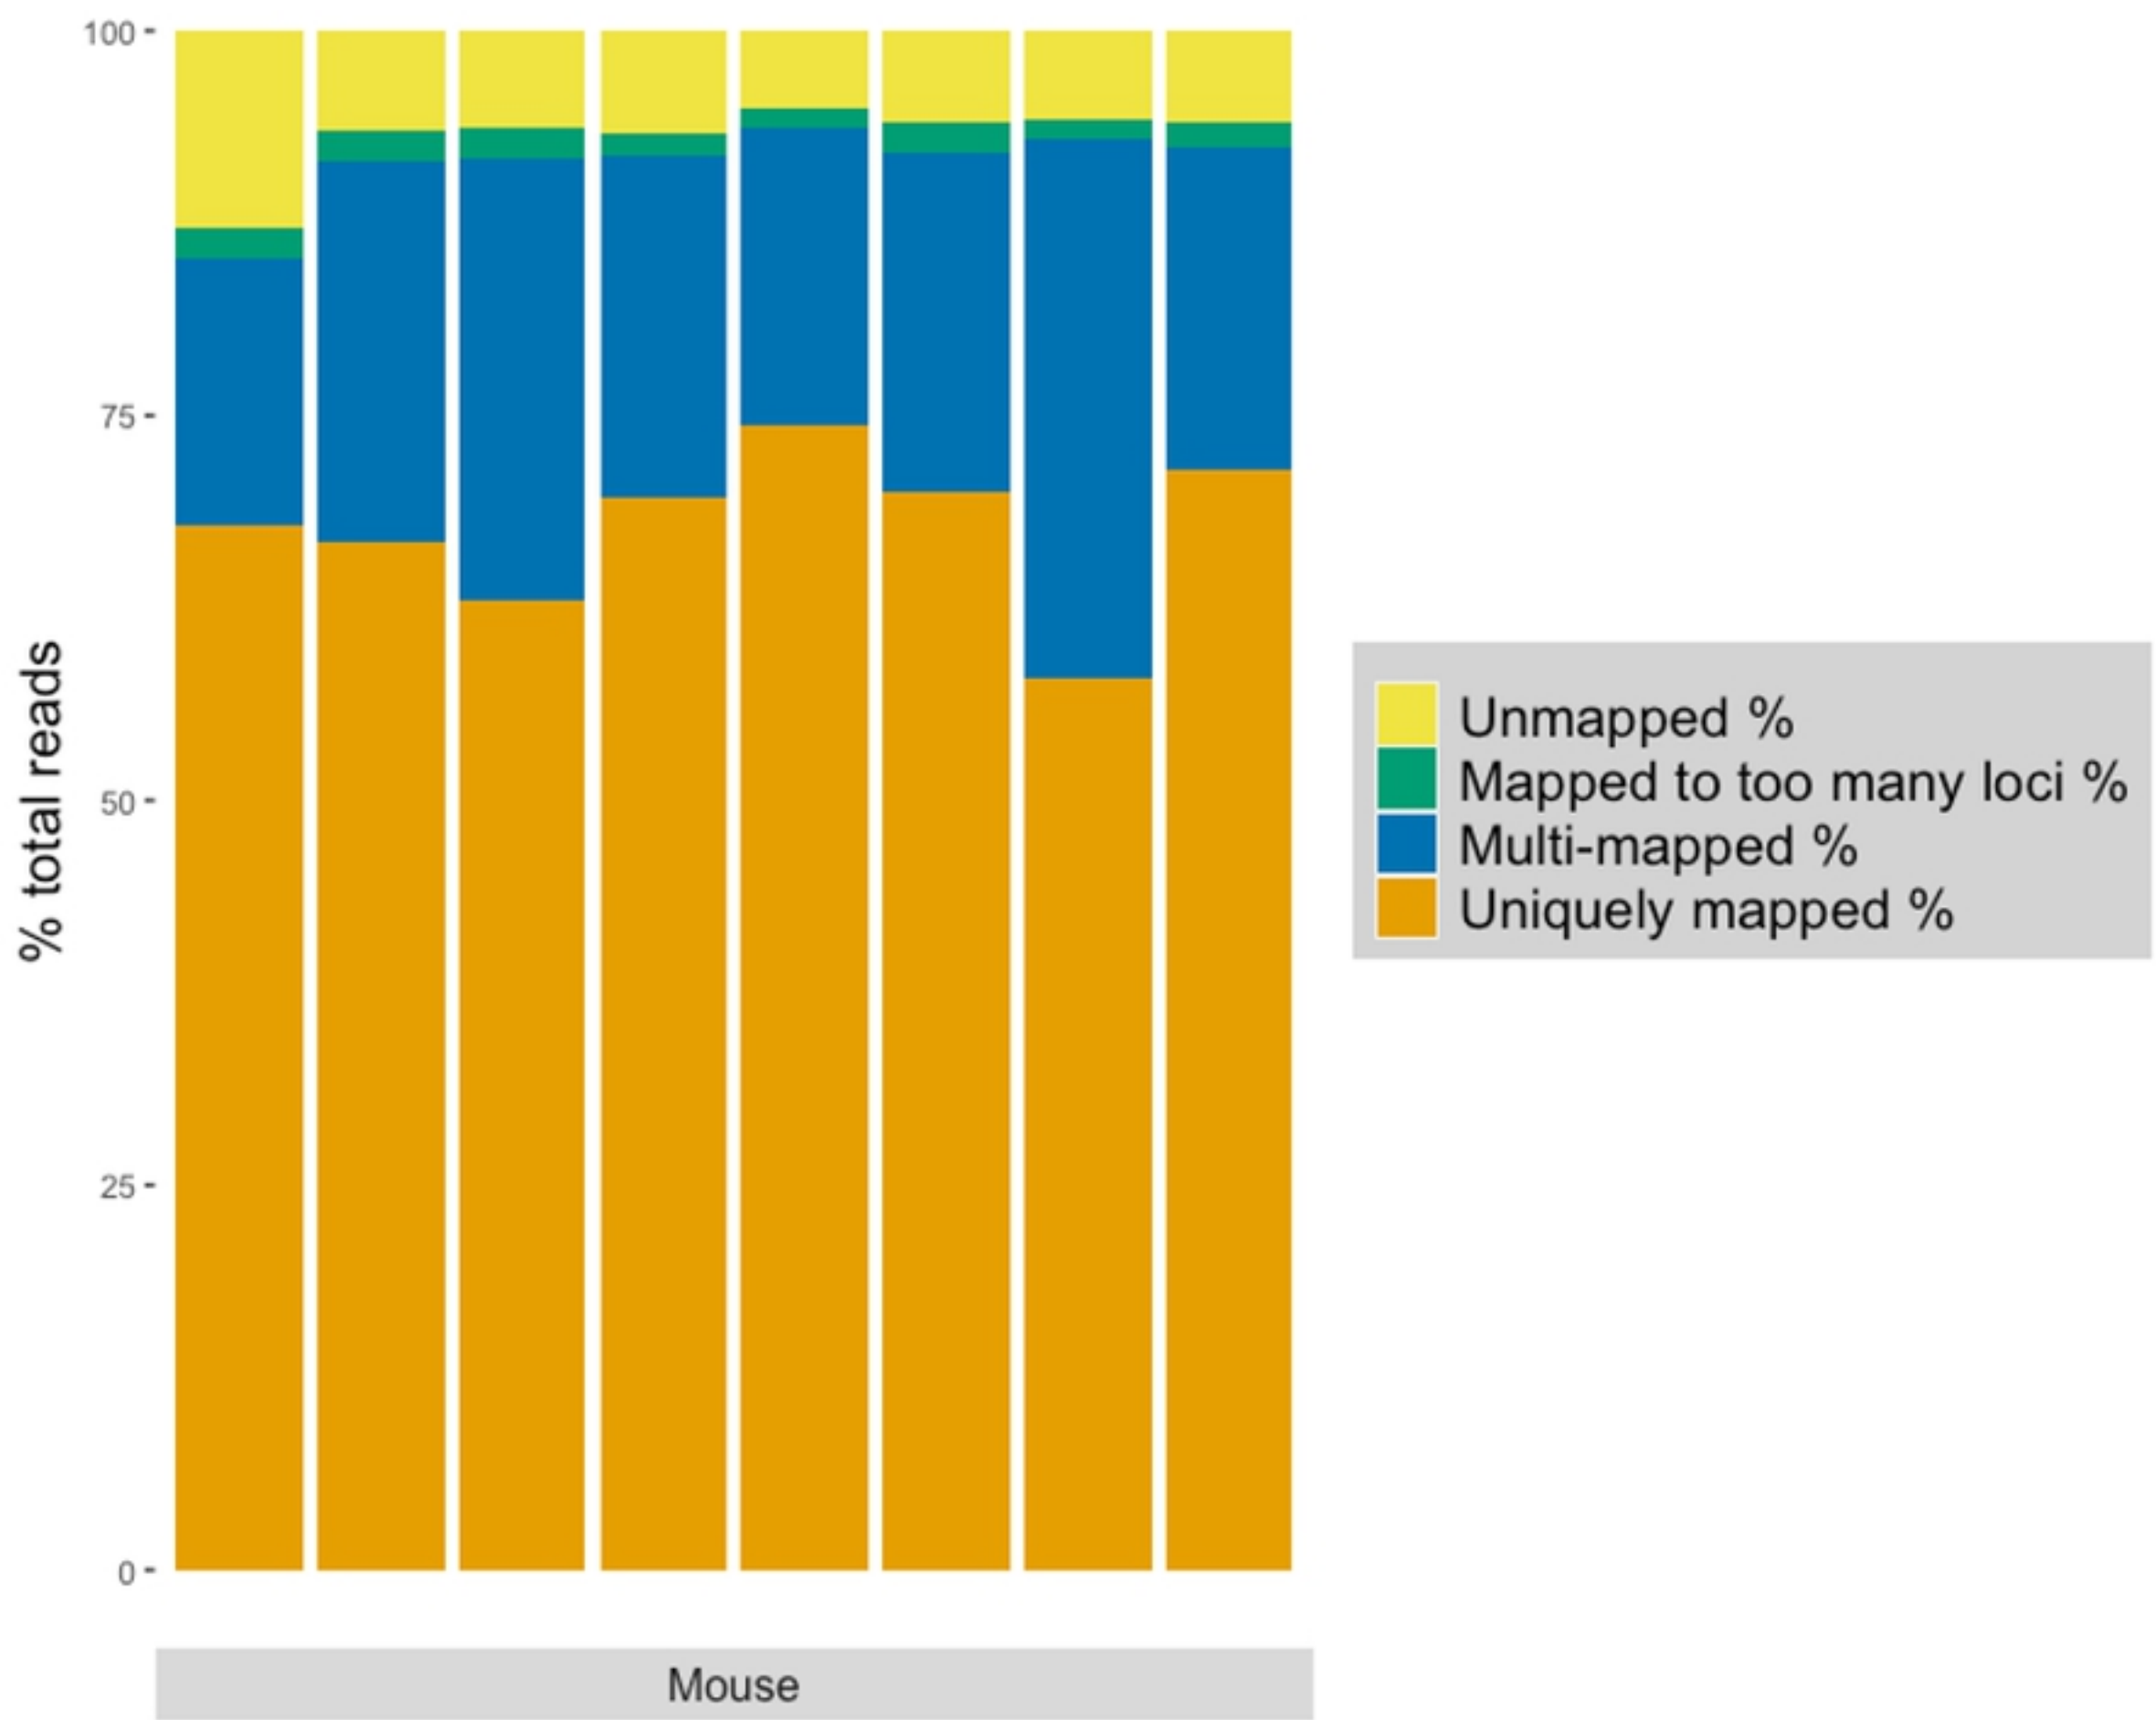

Fig.3

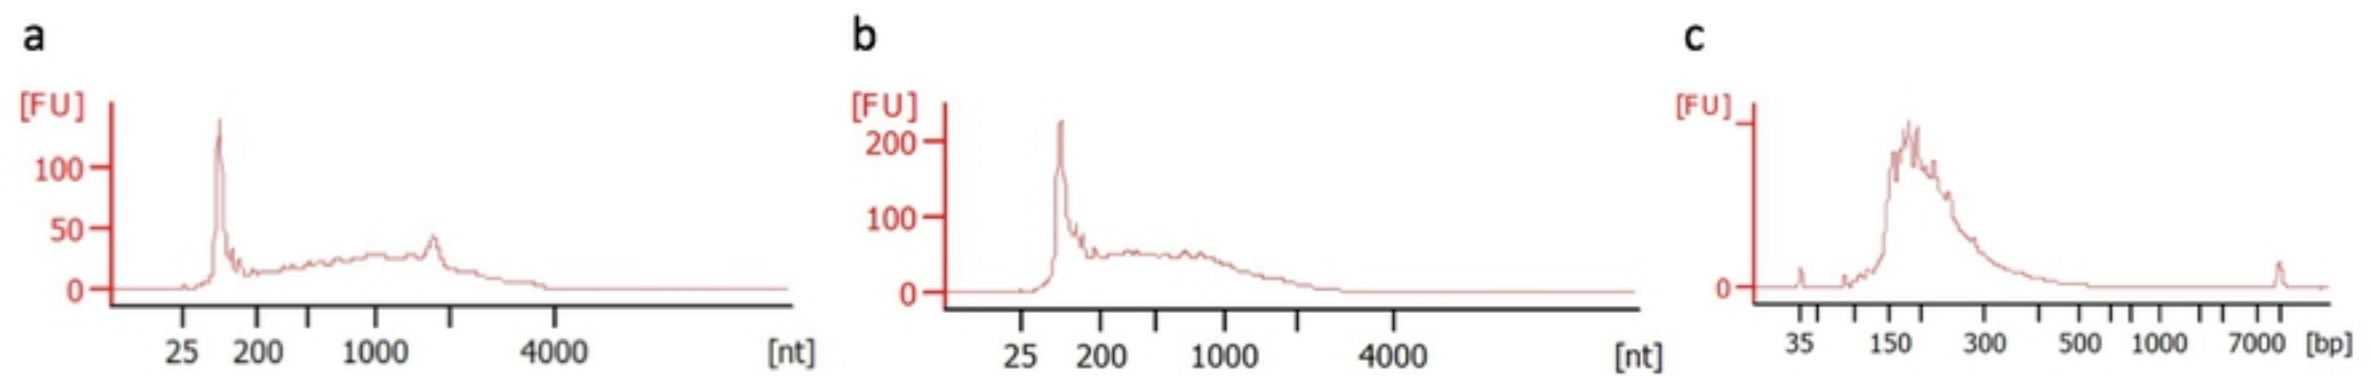

Fig.4

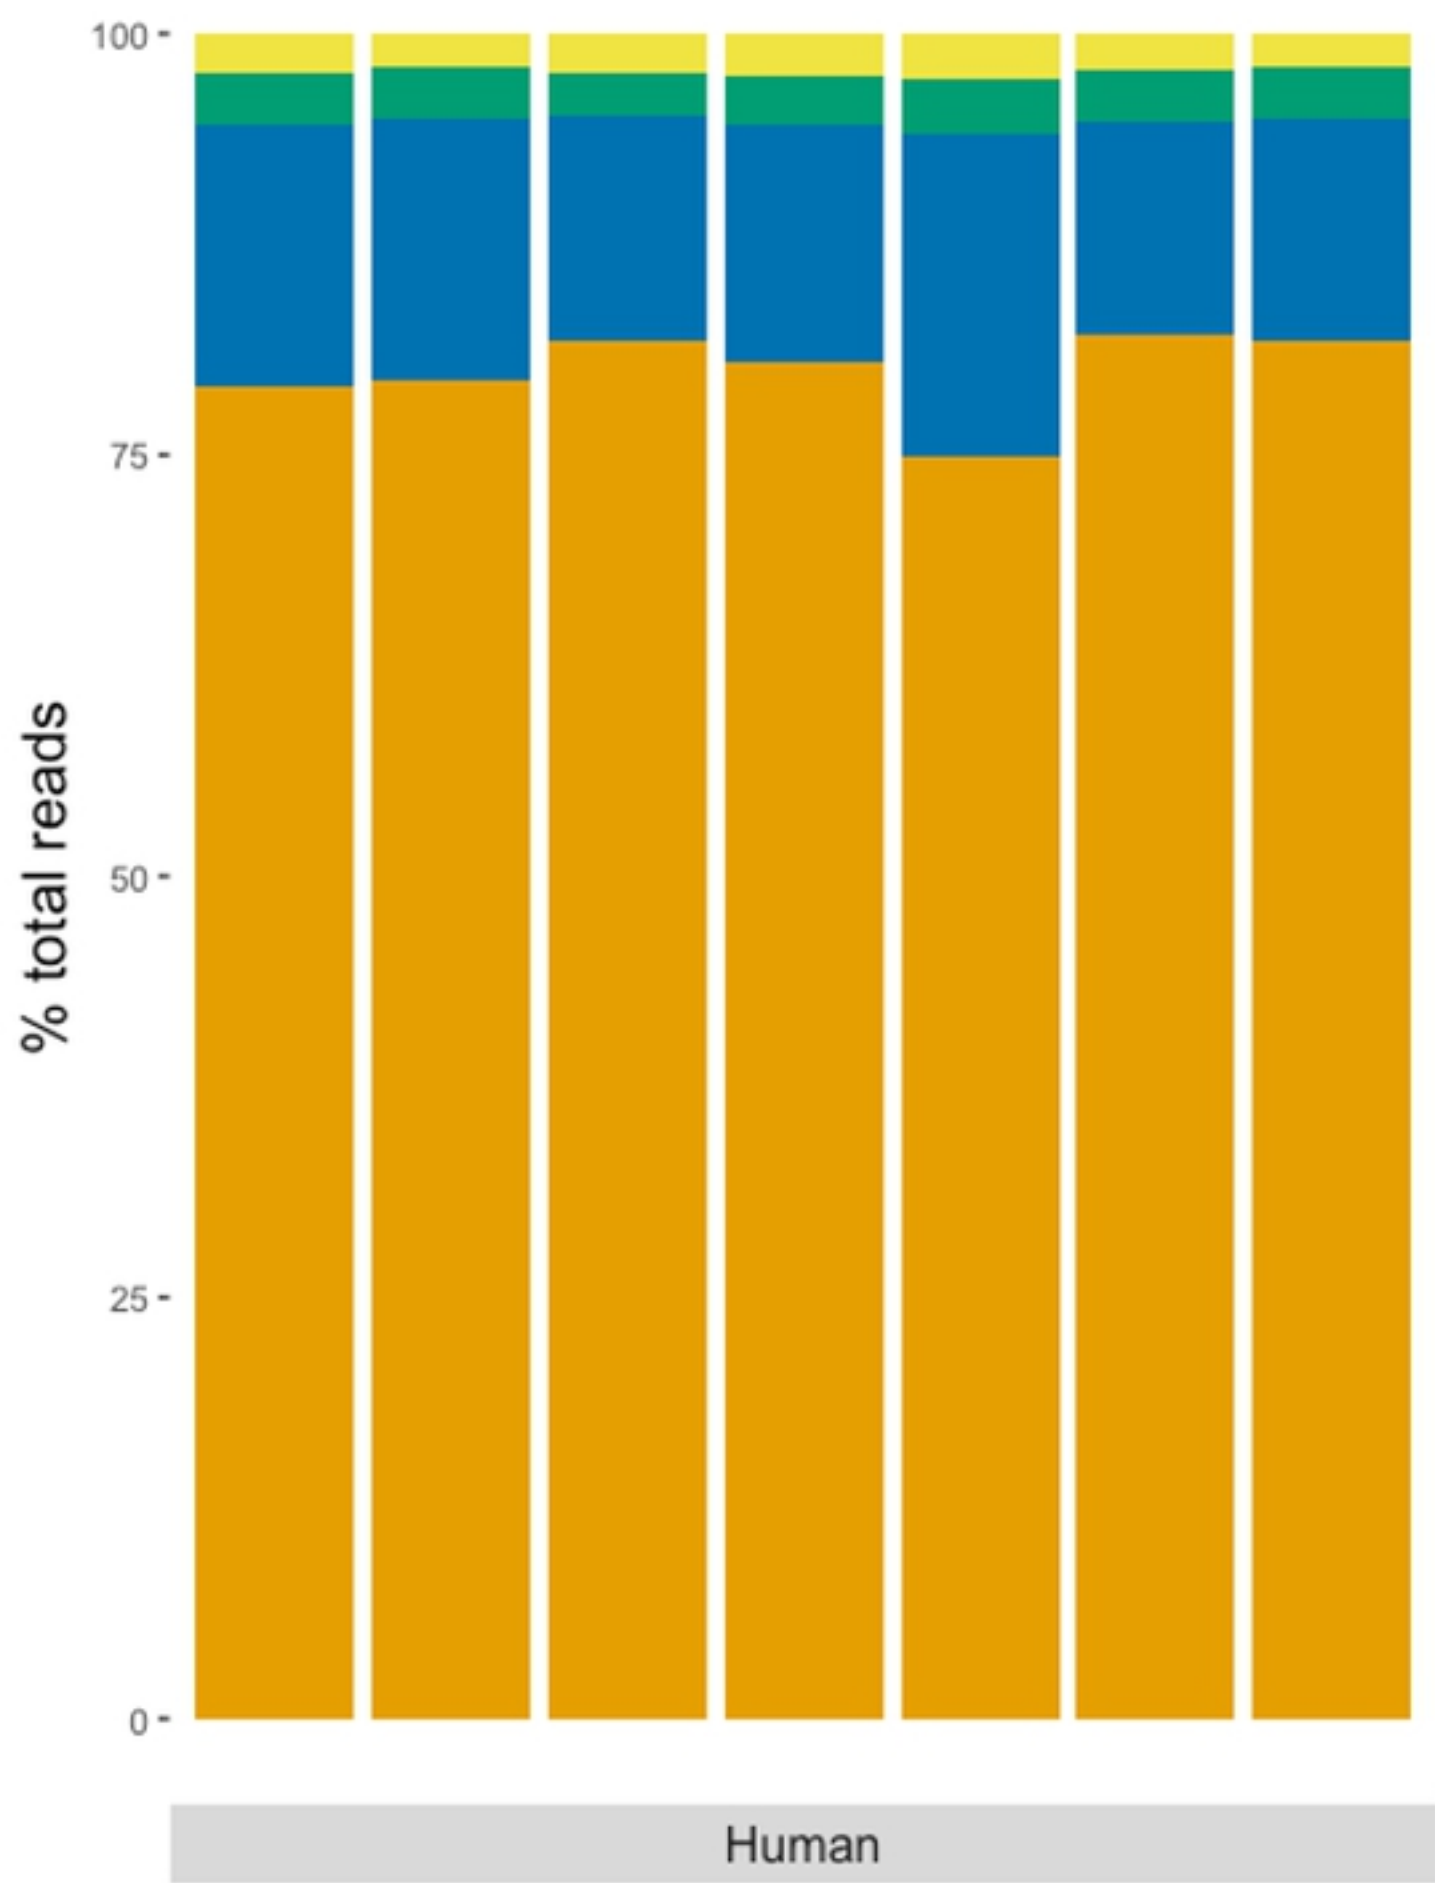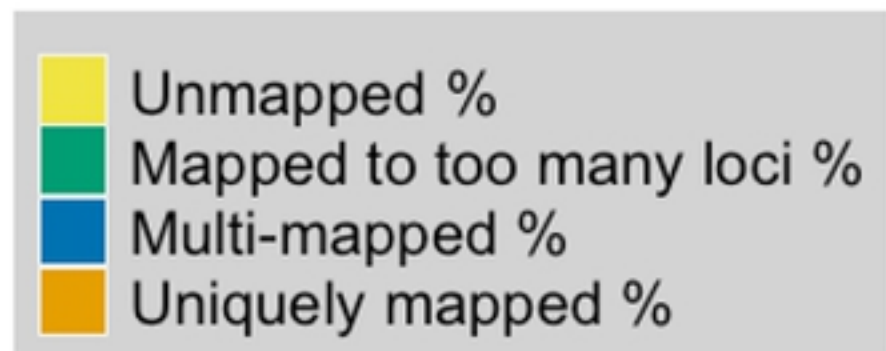

Fig.5



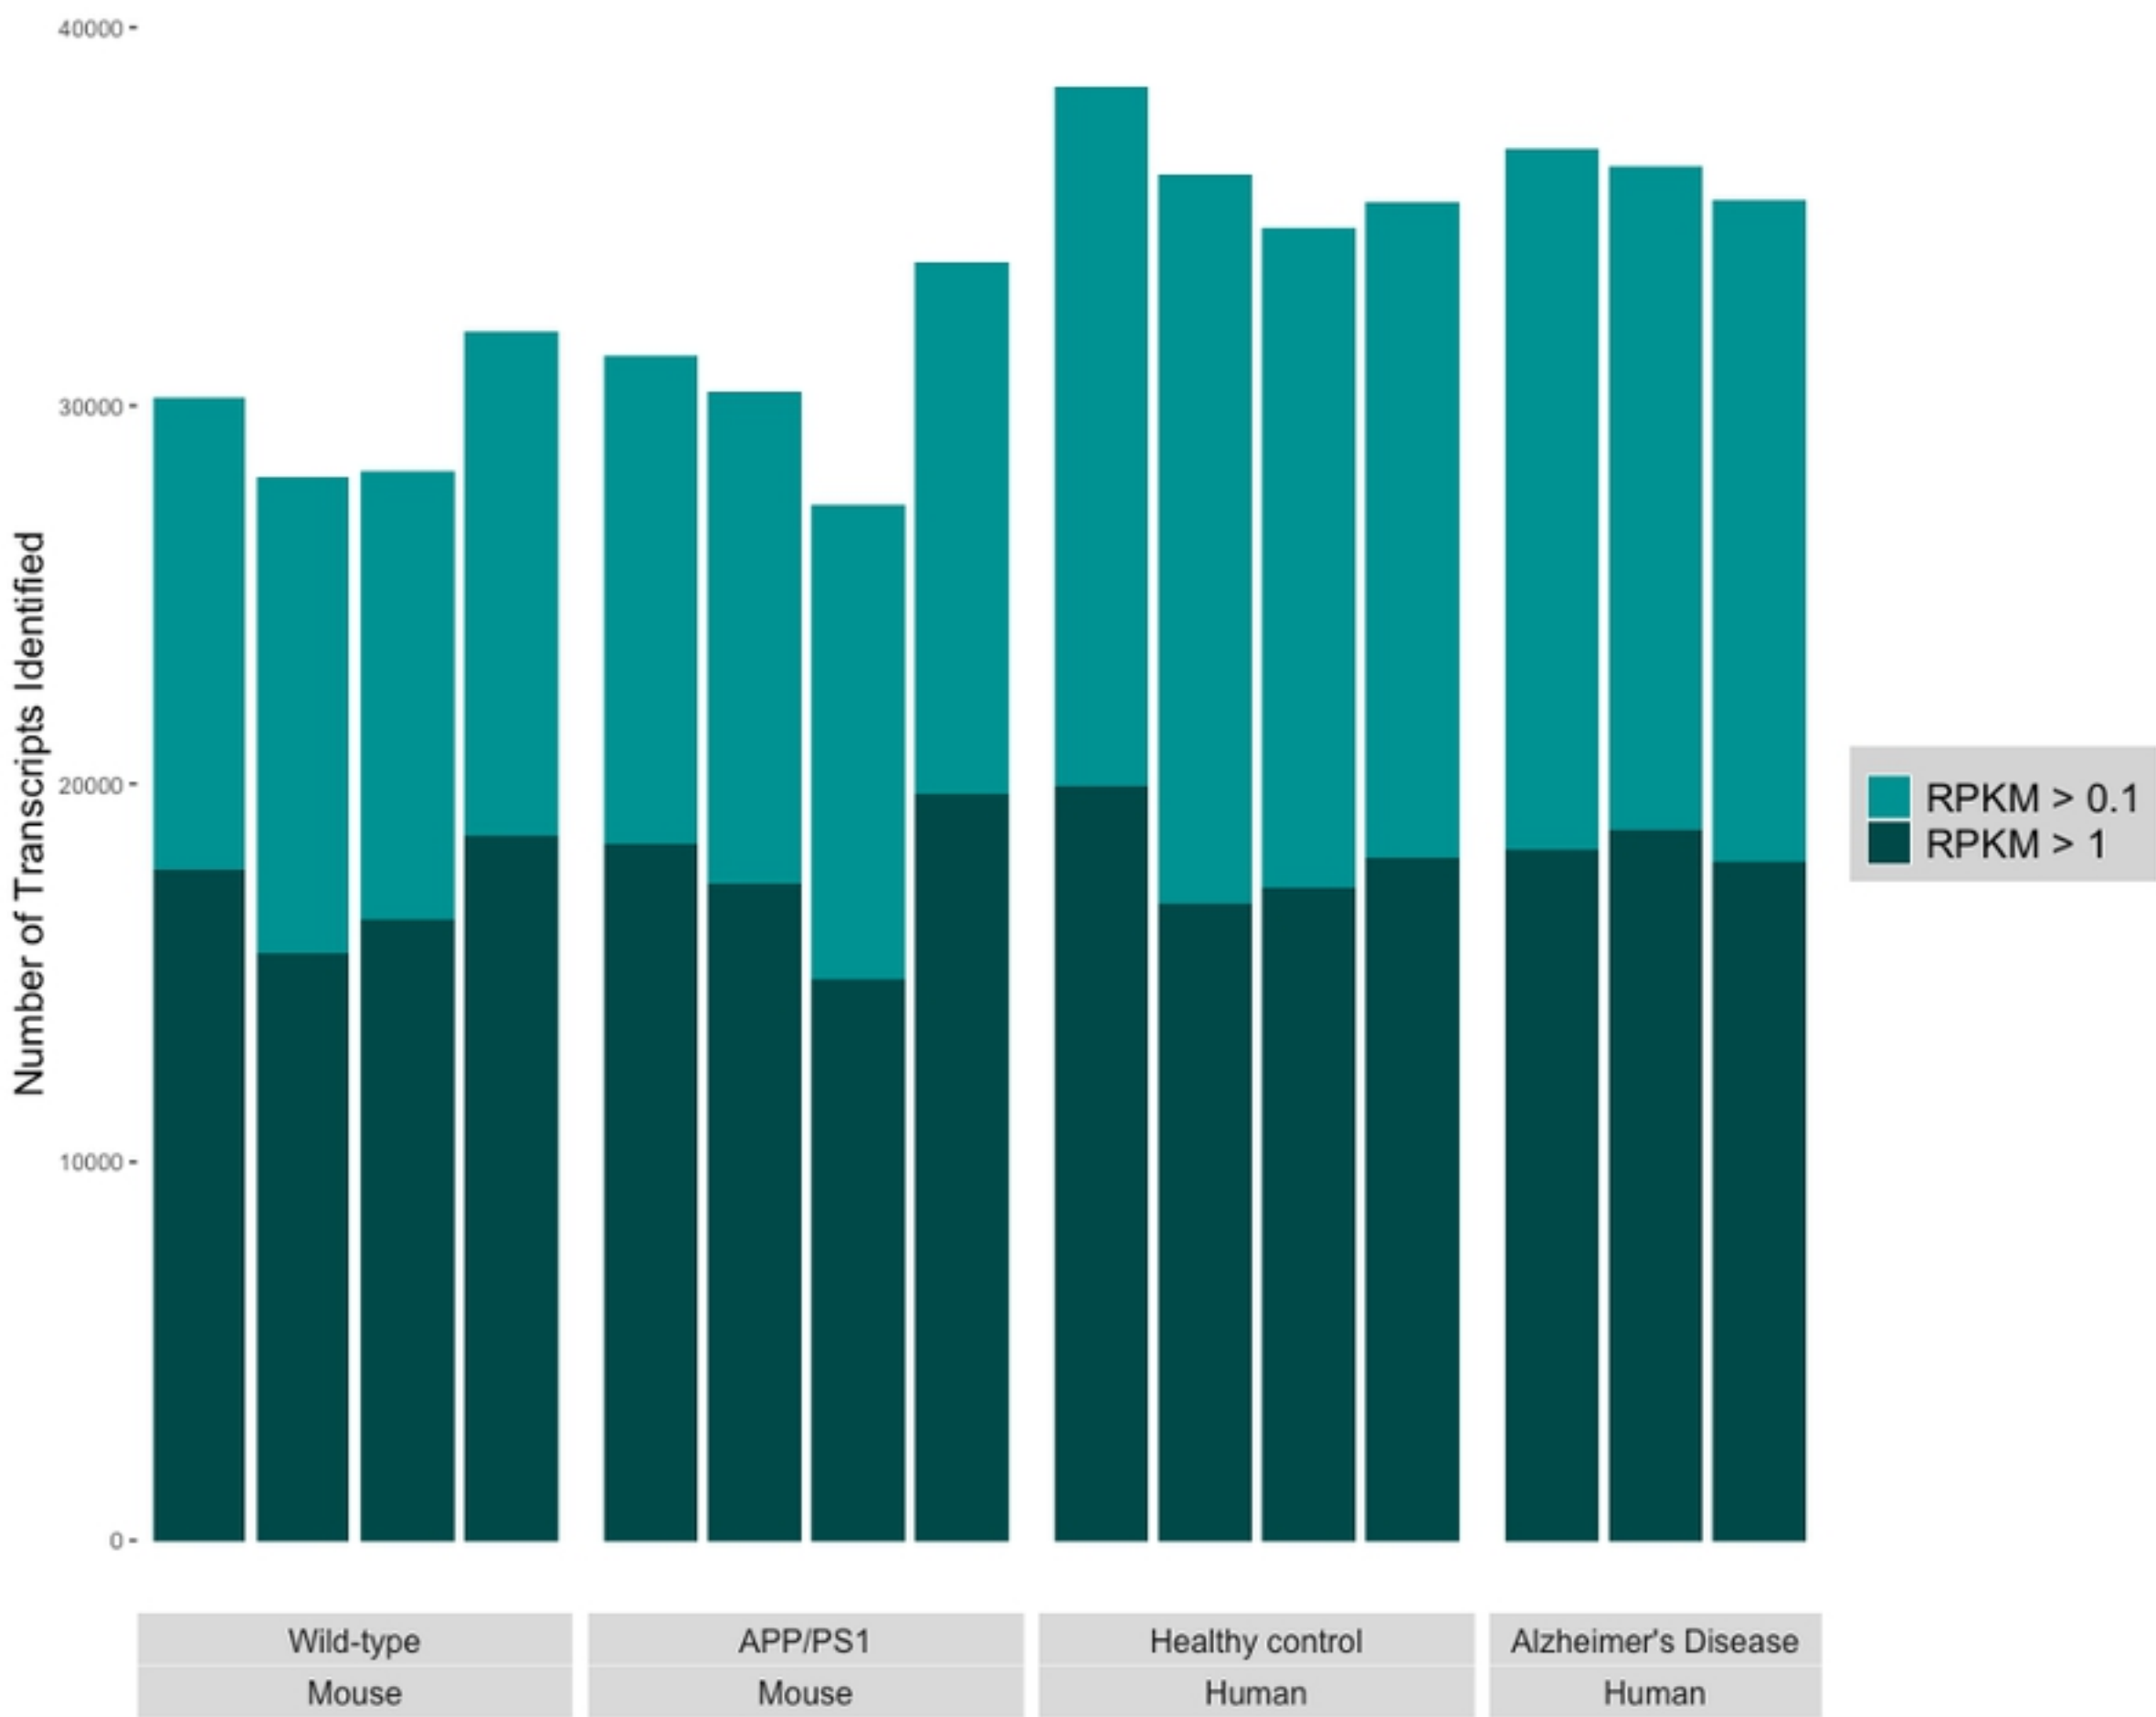

Fig.6

a

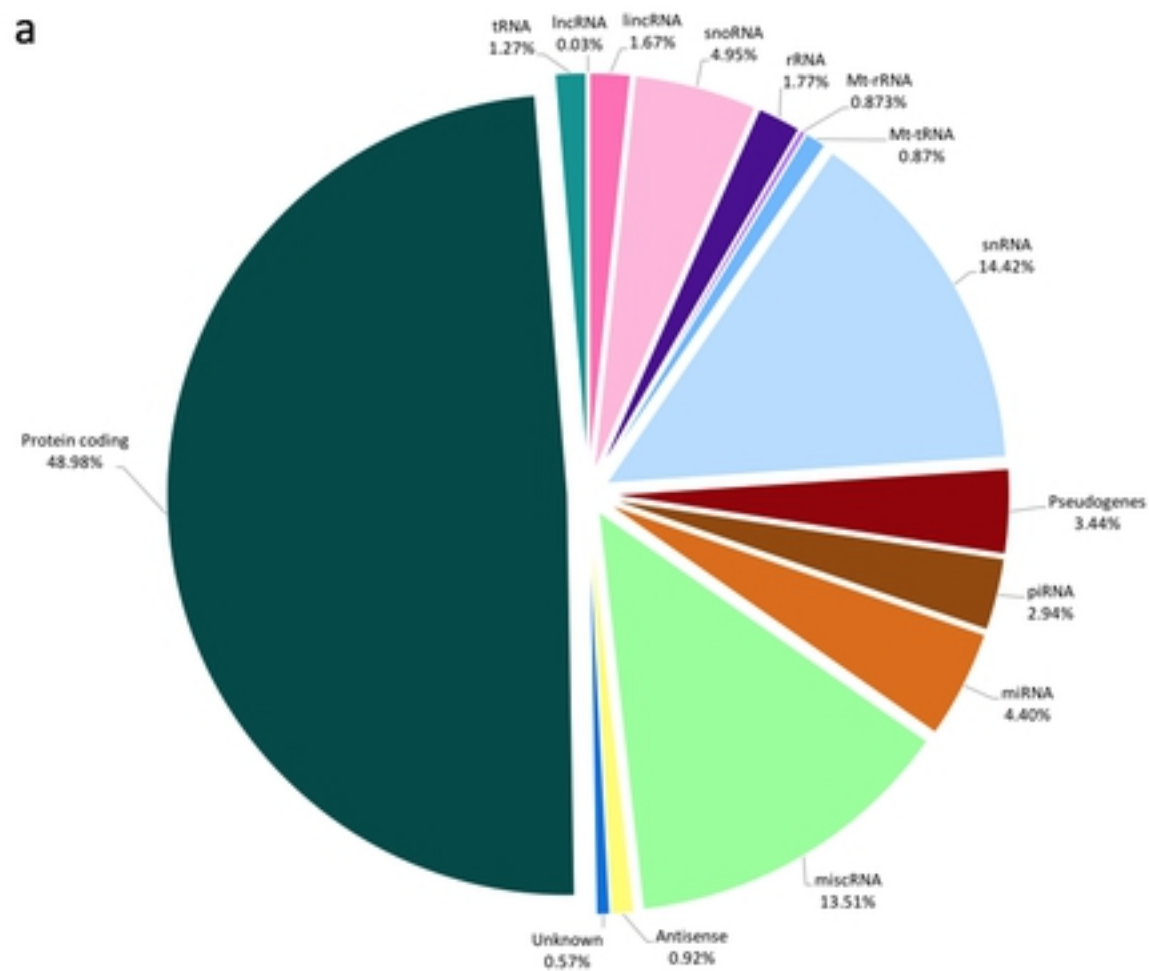

b

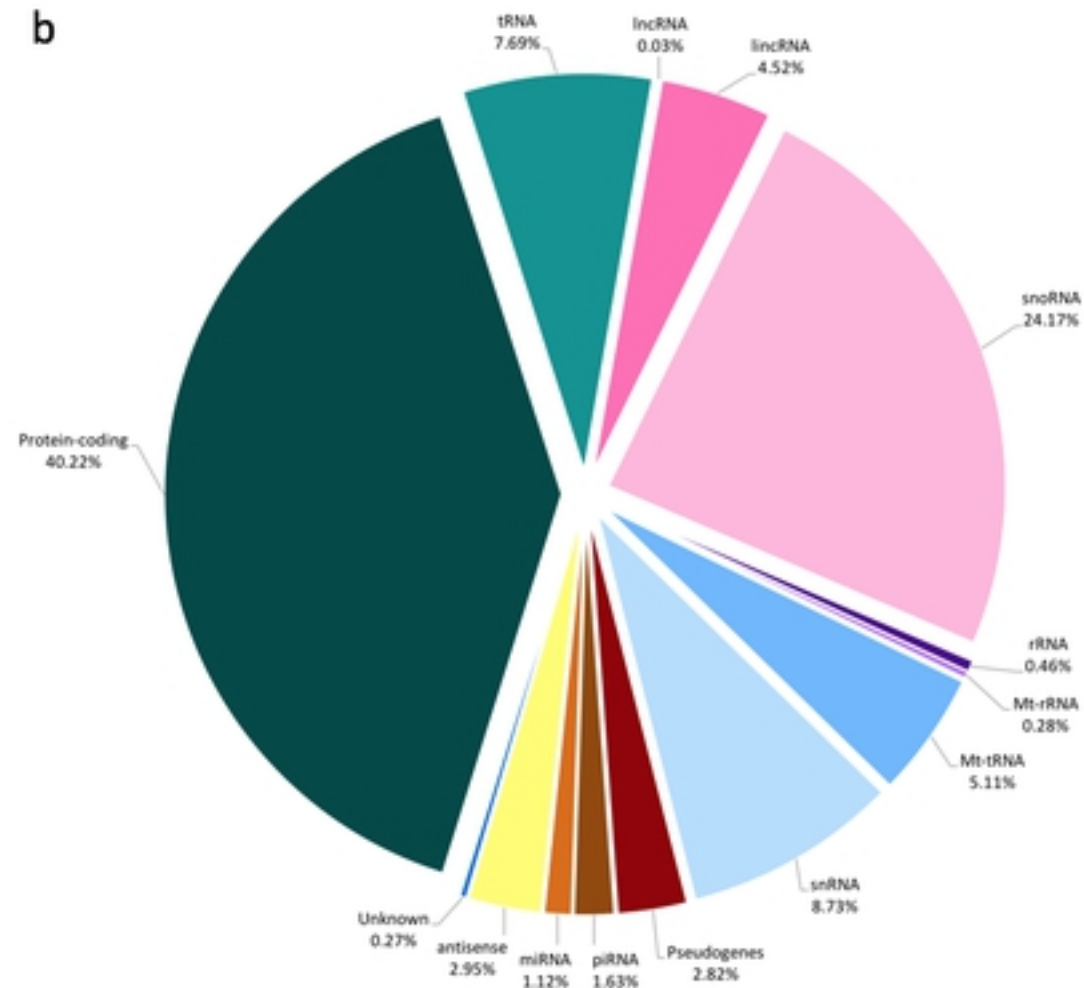

Fig.7

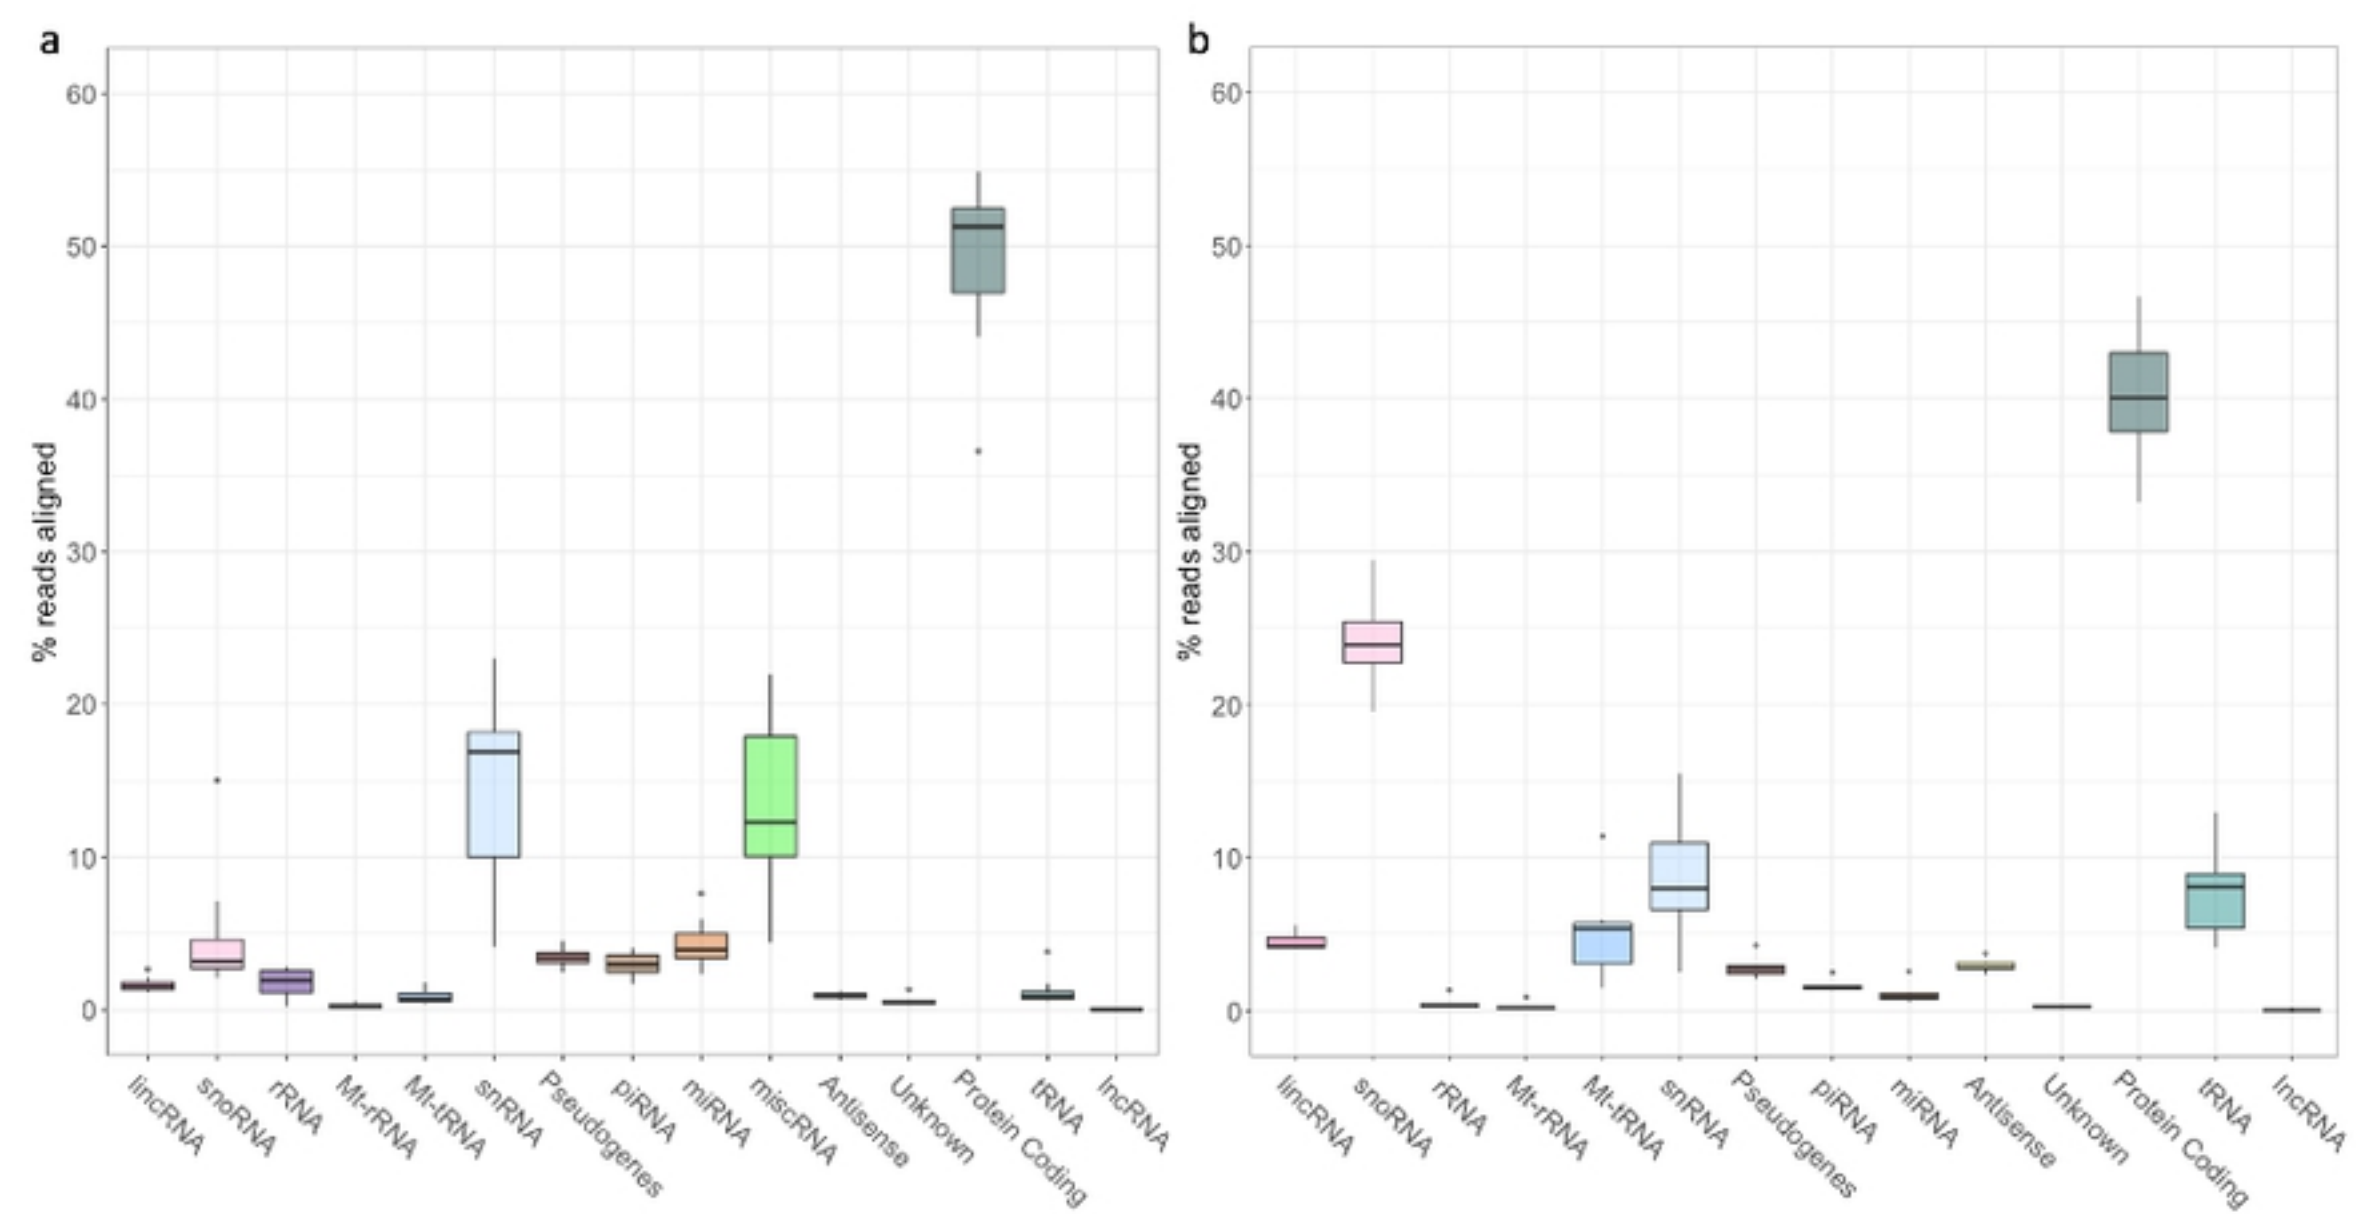

Fig.8

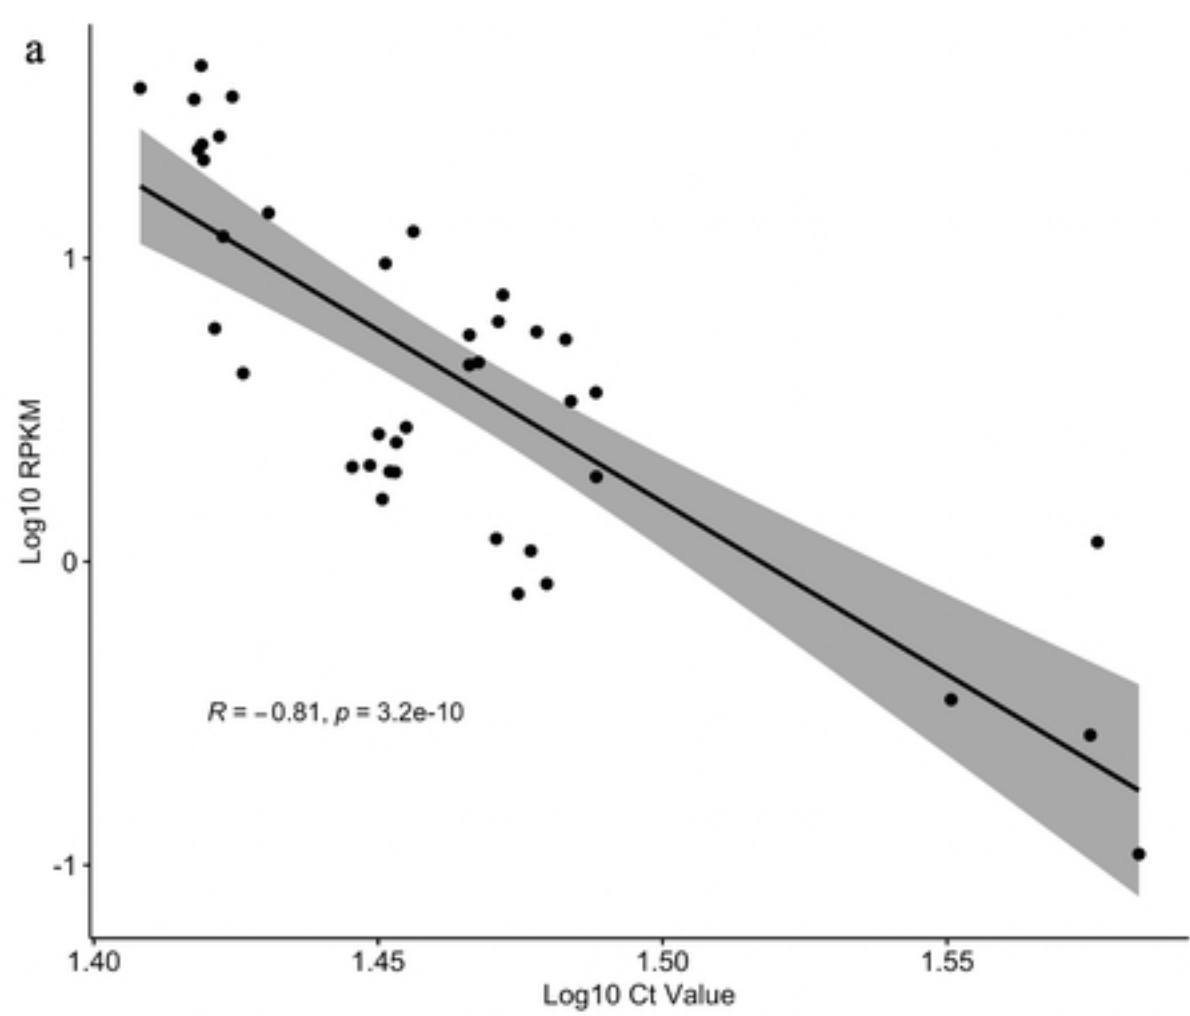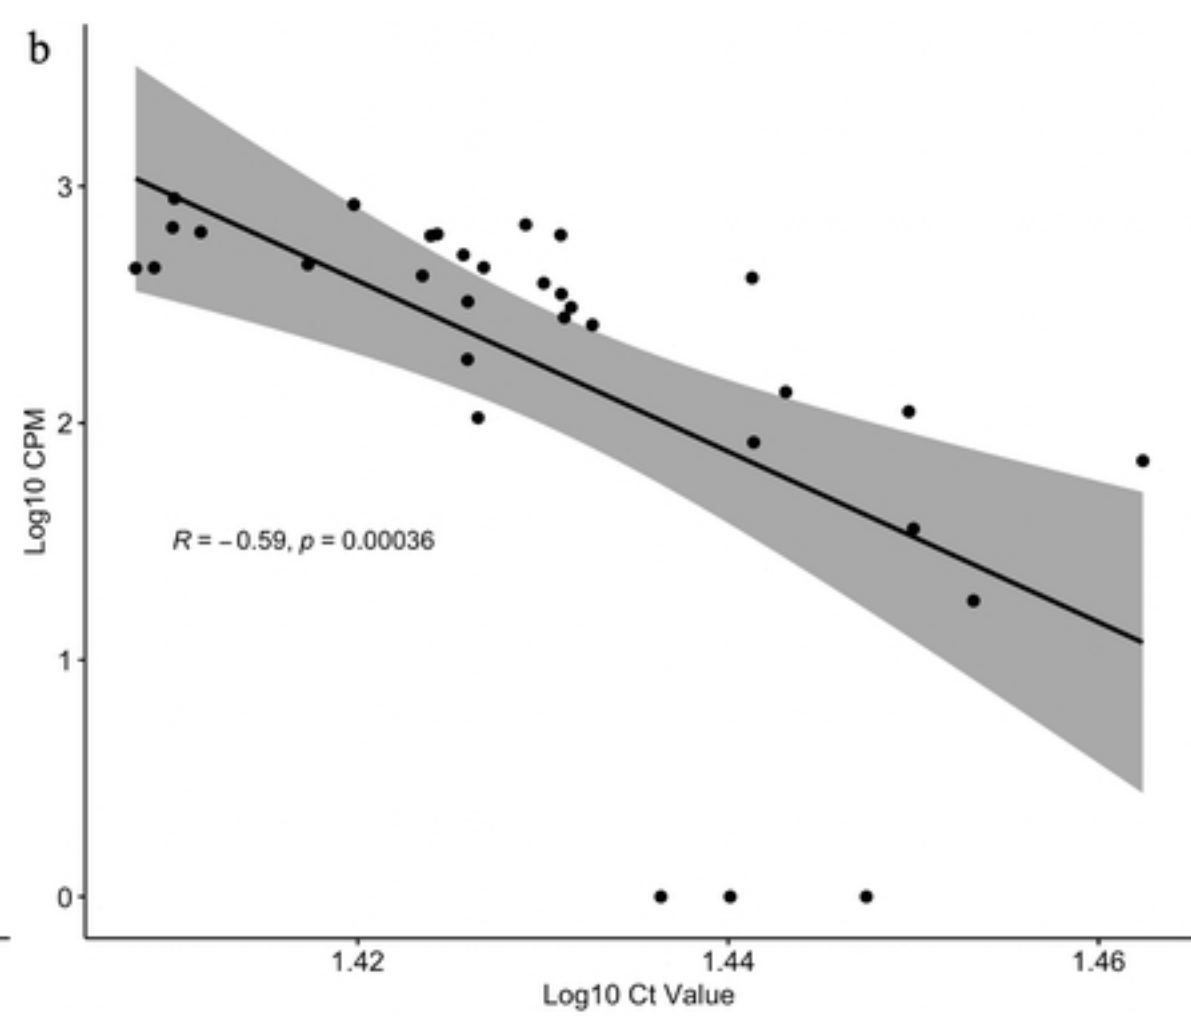

Fig.9
